# Supplementary material for: Iodine mediated/Brønsted acid-catalyzed dimerization of vinylarenes: a tandem reaction through Ritter trapping to produce N-(4-iodo-1,3-diarylbutyl) acetamides
Source: Royal Society of Chemistry journal article supplement (doi:10.1039/c2ob25142f), 2012-01-01

## Supplementary information

**Iodine mediated/Brønsted acid-catalyzed dimerization of vinylarenes: a tandem reaction through Ritter trapping to produce *N*-(4-iodo-1,3-diarylbutyl)acetamides**

**Jing-Mei Huang,<sup>\*,[a]</sup> Zhi-Jun Ye,<sup>[a]</sup> Dong-Song Chen<sup>[a]</sup> and Hong Zhu<sup>[b]</sup>**

[a] School of Chemistry and Chemical Engineering, South China University of Technology, Guangzhou, Guangdong, 510640 (P. R. China). Email: chehjm@scut.edu.cn

[b] Experiment and Practice Training Center, GuangDong Food and Drug Vocational College, Guangzhou, Guangdong, 510520 (P. R. China)

**Table of contents**

General methods.....2

Experimental procedure.....2

X-ray crystallography structure of crystal **3a**.....3

The <sup>1</sup>H NMR spectra of compound **3a** (one of the major isomers).....4

Spectroscopic data of products.....5

Copies of NMR spectra of all products in table 2.....12

## General method

Reagents and solvents were obtained from commercial sources and were used without further purification. Progresses of reactions were monitored by Thin Layer Chromatography while purification was effected using silica gel column chromatography.

Acetonitrile (analytical grade) was purchased from Baishi Chemical Co., Ltd and used as received; acrylonitrile (analytical grade) was purchased from Kermel Co., Ltd and used as received; benzonitrile (chemically pure) was purchased from Aladian Corporation in China and used as received; bromoacetonitrile and phenylacetonitrile (analytical grade) were purchased from Alfa and used as received; 4-bromostyrene, 4-methylphenylene and 2-vinylnaphthalene were purchased from Alfa; 4-fluorostyrene, 4-chlorostyrene, 4-methoxystyrene were purchased from J&K Corporation in China; styrene and iodine were purchased from Yongda Chemical R&D Center; *p*-toluenesulfonic acid was purchased from Runjie Chemical Co., Ltd.

Analytical thin layer chromatography (TLC) plates and the silica gel for column chromatography were phased from Qingdao Haiyang Chemical and Special Silica Gel Co., Ltd.

Proton nuclear magnetic resonance ( $^1\text{H}$  NMR) and carbon nuclear magnetic resonance ( $^{13}\text{C}$  NMR) spectroscopy were performed on Bruker Advance 300 and 400 NMR spectrometers. Chemical shifts of  $^1\text{H}$  NMR spectra are reported as in units of parts per million (ppm) downfield from  $\text{SiMe}_4$  ( $\delta$  0.0) and relative to the signal of chloroform-*d* ( $J = 7.264$ , singlet). Multiplicities were given as: s (singlet); br s (broad singlet); d (doublet); t (triplet); q (quartet); dd (doublet of doublets); m (multiplets), etc. The number of protons (*n*) for a given resonance is indicated by *n*H. Carbon nuclear magnetic resonance spectra ( $^{13}\text{C}$  NMR) are reported as in units of parts per million (ppm) downfield from  $\text{SiMe}_4$  ( $\delta$  0.0) and relative to the signal of chloroform-*d* ( $J = 77.03$ , triplet).

Infrared spectra were recorded on a BRUKE Tensor 27 FTIR spectrometer. The oil samples were examined under neat conditions.

Melting points were recorded on X-4 microscope melting point apparatus.

HRMS data were collected on Q-star Elite, ELI-LC-MS/MS (product from ABI, America).

## Experimental procedure

**General Procedure for the Reaction to Afford 3a:** A mixture of PTSA (17 mg, 0.1 mmol), iodine (254 mg, 1.0 mmol) and 1 mL acetonitrile was stirred for 5 min in a round bottom flask (5 mL) at 0 °C, and then styrene (114  $\mu\text{L}$ , 1 mmol) was added at 0 °C. The resulting mixture was stirred at 0 °C to room temperature for 24 h. Then, saturated  $\text{Na}_2\text{S}_2\text{O}_3$  (3 mL) was added to the reaction mixture and the resulting solution was extracted with ethyl acetate ( $2 \times 15$  mL). The combined organic layer was washed with brine (5 mL), and then dried over anhydrous sodium sulfate. The organic solvent was removed on a rotary evaporator under vacuum. The residue was purified by column chromatography on silica gel (petroleum ether/ethyl acetate 2:1) and **3a** was obtained as a solid (134 mg, 68%).

## X-ray Crystallography Structure of 3a

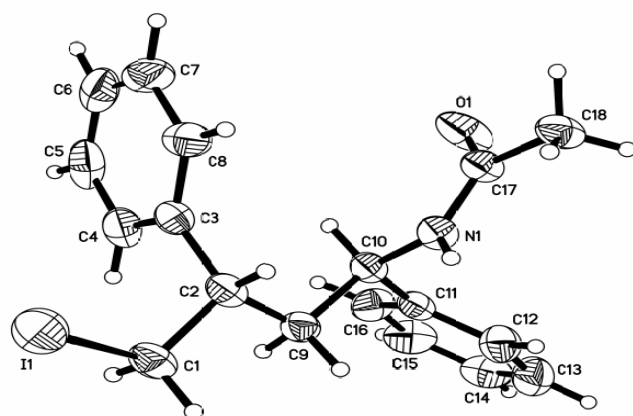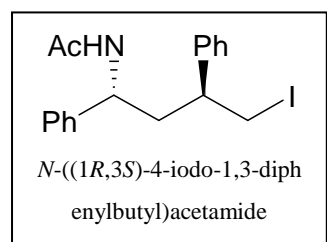

CCDC 838337 contains the supplementary crystallographic data for product **3a** (one of the major isomers). These data can be obtained free of charge from The Cambridge Crystallographic Data Centre via [www.ccdc.cam.ac.uk/data\\_request/cif](http://www.ccdc.cam.ac.uk/data_request/cif).

**Figure 1.** X-ray crystal structure of the compound **3a** (one of the major isomers).

**Table 1.** Crystal data and structure refinement of **3a** (one of the major isomers).

|                                      |                                                              |                     |
|--------------------------------------|--------------------------------------------------------------|---------------------|
| Empirical formula                    | $C_{18}H_{20}INO$                                            |                     |
| Formula weight                       | 393.25                                                       |                     |
| Temperature                          | 173(2) K                                                     |                     |
| Wavelength                           | 0.71073 Å                                                    |                     |
| Crystal system                       | Monoclinic                                                   |                     |
| Space group                          | Cc                                                           |                     |
| Unit cell dimensions                 | $a = 10.3319(4)$ Å                                           | $\alpha = 90^\circ$ |
|                                      | $b = 21.2699(8)$ Å                                           | $\beta = 120^\circ$ |
|                                      | $c = 9.3647(4)$ Å                                            | $\gamma = 90^\circ$ |
| Volume                               | $1770.50(12)$ Å <sup>3</sup>                                 |                     |
| Z                                    | 4                                                            |                     |
| Density (calculated)                 | $1.475$ Mg/m <sup>3</sup>                                    |                     |
| Absorption coefficient               | $1.808$ mm <sup>-1</sup>                                     |                     |
| F(000)                               | 784                                                          |                     |
| Crystal size                         | $0.30 \times 0.25 \times 0.20$ mm <sup>3</sup>               |                     |
| Theta range for data collection      | 1.91 to 30.52 °                                              |                     |
| Index ranges                         | $-14 \leq h \leq 14, -30 \leq k \leq 30, -13 \leq l \leq 13$ |                     |
| Reflections collected                | 12308                                                        |                     |
| Independent reflections              | 4293 [ $R(\text{int}) = 0.0223$ ]                            |                     |
| Completeness to theta = 30.52        | 99.6 %                                                       |                     |
| Absorption correction                | Multi-scan                                                   |                     |
| Max. and min. transmission           | 0.7138 and 0.6131                                            |                     |
| Refinement method                    | Full-matrix least-squares on $F^2$                           |                     |
| Data / restraints / parameters       | 4293 / 2 / 191                                               |                     |
| Goodness-of-fit on $F^2$             | 1.156                                                        |                     |
| Final R indices [ $I > 2\sigma(I)$ ] | $R_1 = 0.0339, wR_2 = 0.0975$                                |                     |
| R indices (all data)                 | $R_1 = 0.0368, wR_2 = 0.1084$                                |                     |
| Largest diff. peak and hole          | $1.194$ and $-1.047$ e.Å <sup>-3</sup>                       |                     |

The  $^1\text{H}$  NMR spectra of compound **3a** (one of the major isomers)

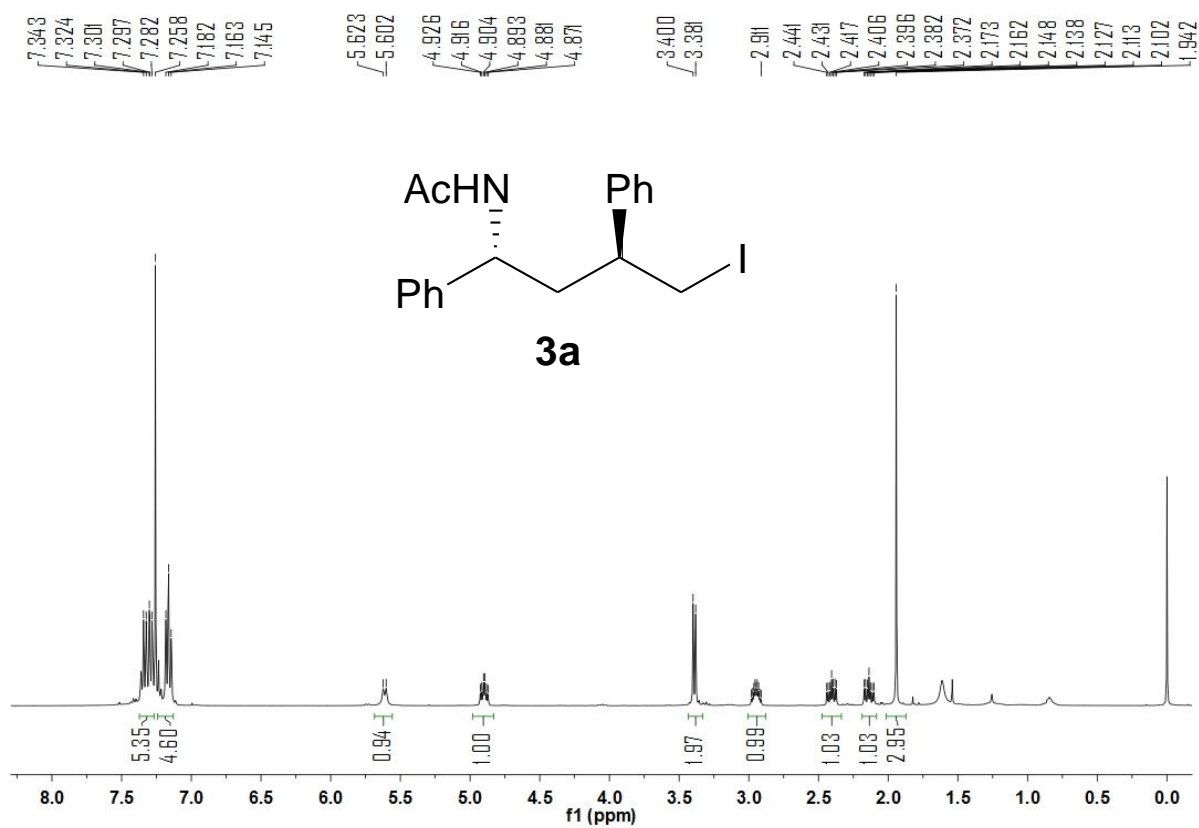

## Spectroscopic data of products

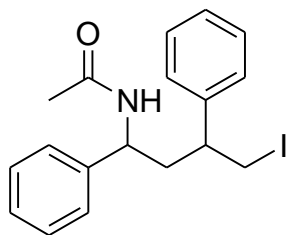

### ***N*-(4-iodo-1,3-diphenylbutyl)acetamide (3a)**

Solid (134mg, 68%); mp. 162–164°C (one of the major isomers, recrystallized from the mixture of dichloromethane and ether);

FTIR (KBr,  $\text{cm}^{-1}$ ): 3272, 1648, 1549, 1295;

Major isomer,  $^1\text{H}$  NMR ( $\text{CDCl}_3$ ; 400 MHz; TMS):  $\delta$  7.34–7.10(m, 10H,  $10 \times Ph$ ), 6.05 (d,  $J = 8.6$  Hz, 1H, NH), 4.84 (td,  $J = 9.2, 4.2$  Hz, 1H, NHCH), 3.35(d,  $J = 7.2$  Hz, 2H,  $\text{CH}_2\text{I}$ ), 3.02–2.86(m, 1H,  $\text{CHCH}_2\text{I}$ ), 2.41–2.38 (m, 1H,  $1 \times \text{CHCH}_2\text{CHCH}_2\text{I}$ ), 2.12–2.05 (m, 1H,  $1 \times \text{CHCH}_2\text{CHCH}_2\text{I}$ ), 1.89 (s, 3H,  $\text{CH}_3$ ).  $^{13}\text{C}$  NMR ( $\text{CDCl}_3$ ; 100 MHz; TMS):  $\delta$  169.27, 142.39, 142.04, 129.04, 128.84, 127.64, 127.54, 127.52, 126.29, 51.41, 45.59, 42.56, 23.51, 13.21.

Minor isomer,  $^1\text{H}$  NMR ( $\text{CDCl}_3$ ; 400 MHz; TMS):  $\delta$  7.34–7.10 (m, 10H,  $10 \times Ph$ ), 5.94 (d,  $J = 7.7$  Hz, 1H, NH), 4.77–4.72 (m, 1H, NHCH), 3.32–3.28 (m, 2H,  $\text{CH}_2\text{I}$ ), 2.66–2.57 (m, 1H,  $\text{CHCH}_2\text{I}$ ), 2.37–2.26 (m, 2H,  $\text{CHCH}_2\text{CHCH}_2\text{I}$ ), 1.78 (s, 3H,  $\text{CH}_3$ ).  $^{13}\text{C}$  NMR ( $\text{CDCl}_3$ ; 100 MHz; TMS):  $\delta$  169.23, 141.74, 140.99, 128.87, 128.85, 127.85, 127.54, 127.40, 127.01, 52.43, 44.94, 40.81, 23.29, 14.12.

HRMS (ESI):  $m/z$  ( $\text{M}+\text{H}^+$ ) calcd for  $\text{C}_{18}\text{H}_{21}\text{INO}$ , 394.0668. Found: 394.0669.

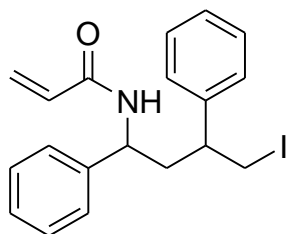

### ***N*-(4-iodo-1,3-diphenylbutyl)acrylamide (3b)**

Solid (180 mg, 90%); mp. 150–152°C (one of the major isomers, recrystallized from the mixture of dichloromethane and ether);

FTIR (KBr,  $\text{cm}^{-1}$ ): 3272, 1654, 1246, 1316;

Major isomer,  $^1\text{H}$  NMR ( $\text{CDCl}_3$ ; 400 MHz; TMS):  $\delta$  7.34–7.09 (m, 10H,  $10 \times Ph$ ), 6.21–5.90 (m, 3H,  $\text{CH}_2=\text{CH}$ ), 5.57 (d,  $J = 10.2$  Hz, 1H, NH), 4.93 (td,  $J = 8.8, 3.9$  Hz, 1H, NHCH), 3.35 (d,  $J = 7.1$  Hz, 2H,  $\text{CH}_2\text{I}$ ), 2.97–2.90 (m,  $\text{CHCH}_2\text{I}$ ), 2.43–2.40 (m, 1H,  $1 \times \text{CHCH}_2\text{CHCH}_2\text{I}$ ), 2.15–2.08 (m, 1H,  $1 \times \text{CHCH}_2\text{CHCH}_2\text{I}$ ).  $^{13}\text{C}$  NMR ( $\text{CDCl}_3$ ; 100 MHz; TMS):  $\delta$  164.89, 142.24, 141.88, major + minor isomer (130.81, 130.72, 128.96, 128.89, 128.87, 128.73, 127.91, 127.56, 127.48, 127.46, 127.42, 127.12, 126.68, 126.60, 126.23), 51.47, 45.41, 42.57, 13.14.

Minor isomer,  $^1\text{H}$  NMR ( $\text{CDCl}_3$ ; 400 MHz; TMS):  $\delta$  7.34–7.09 (m, 10H,  $10 \times Ph$ ), 6.21–5.90 (m, 3H,  $\text{CH}_2=\text{CH}$ ), 5.52 (d,  $J = 10.2$  Hz, 1H, NH), 4.83–4.77 (m, 1H, NHCH), 3.32–3.26 (m, 2H,  $\text{CH}_2\text{I}$ ), 2.63–2.56 (m, 1H,  $\text{CHCH}_2\text{I}$ ), 2.39–2.30 (m, 2H,  $\text{CHCH}_2\text{CHCH}_2\text{I}$ ).  $^{13}\text{C}$  NMR ( $\text{CDCl}_3$ ; 100 MHz; TMS):  $\delta$  164.66, 141.88, 140.72, major + minor isomer (130.81, 130.72, 128.96, 128.89, 128.87, 128.73, 127.91,

127.56, 127.48, 127.46, 127.42, 127.12, 126.68, 126.60, 126.23), 52.48, 44.78, 40.63, 14.11.

HRMS (ESI):  $m/z$  ( $M+H^+$ ) calcd for  $C_{19}H_{21}INO$ , 406.0668. Found: 406.0673.

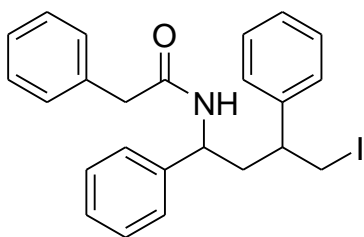

***N*-(4-iodo-1,3-diphenylbutyl)-2-phenylacetamide (3c)**

Solid (169mg, 72%); mp. 154–156°C (one of the major isomers, recrystallized from the mixture of dichloromethane and ether);

FTIR (KBr,  $cm^{-1}$ ): 3287, 1645, 1543, 1254;

One isomer,  $^1H$  NMR ( $CDCl_3$ ; 400 MHz; TMS):  $\delta$  7.38–7.16 (m, 10H,  $10 \times Ph$ ), 7.07–7.01 (m, 5H,  $5 \times Ph$ ), 5.78 (d,  $J = 8.5$  Hz, 1H, NH), 4.81–4.76 (m, 1H, NHCH), 3.49 (d,  $J = 3.3$ , 2H,  $CH_2CO$ ), 3.28–3.25 (m, 2H,  $CH_2I$ ), 2.82–2.75 (m, 1H,  $CHCH_2I$ ), 2.27–2.24 (m, 1H,  $1 \times CHCH_2CHCH_2I$ ), 2.04–2.00 (m, 1H,  $1 \times CHCH_2CHCH_2I$ ).

The other isomer,  $^1H$  NMR ( $CDCl_3$ ; 400 MHz; TMS):  $\delta$  7.38–7.16 (m, 10H,  $10 \times Ph$ ), 7.07–7.01 (m, 5H,  $5 \times Ph$ ), 5.72 (d,  $J = 7.6$  Hz, 1H, NH), 4.81–4.76 (m, 1H, NHCH), 3.39 (s, 2H,  $CH_2CO$ ), 3.28–3.25 (m, 2H,  $CH_2I$ ), 2.57–2.51 (m, 1H,  $CHCH_2I$ ), 2.23–2.15 (m, 2H,  $CHCH_2CHCH_2I$ ).

Both of the two isomers,  $^{13}C$  NMR ( $CDCl_3$ ; 100 MHz; TMS):  $\delta$  170.25, 170.09, 142.11, 142.10, 141.84, 140.96, 135.03, 134.88, 129.41, 129.36, 129.35, 129.17, 128.98, 128.96, 128.89, 128.85, 128.83, 128.66, 127.55, 127.48, 127.45, 127.36, 127.34, 127.31, 126.78, 126.00, 52.31, 51.30, 45.68, 44.80, 43.98, 43.68, 42.73, 40.98, 14.07, 12.98.

HRMS (ESI):  $m/z$  ( $M+H^+$ ) calcd for  $C_{24}H_{25}INO$ , 470.0981. Found: 470.0983.

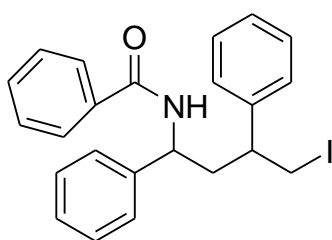

***N*-(4-iodo-1,3-diphenylbutyl)benzamide (3d)**

Solid (146mg, 64%); mp. 186–188°C (one of the major isomers, recrystallized from the mixture of dichloromethane and ether);

FTIR (KBr,  $cm^{-1}$ ): 3293, 1636, 1533, 1278;

One isomer,  $^1H$  NMR ( $CDCl_3$ ; 400 MHz; TMS):  $\delta$  7.63–7.14 (m, 15H,  $15 \times Ph$ ), 6.40 (d,  $J = 8.2$  Hz, 1H, NH), 5.14 (td,  $J = 8.7, 3.3$  Hz, 1H, NHCH), 3.38 (d,  $J = 7.2$  Hz, 2H,  $CH_2I$ ), 3.03–2.97 (m, 1H,  $CHCH_2I$ ), 2.60–2.55 (m, 1H,  $1 \times CHCH_2CHCH_2I$ ), 2.28–2.21 (m, 1H,  $1 \times CHCH_2CHCH_2I$ ).

The other isomer,  $^1H$  NMR ( $CDCl_3$ ; 400 MHz; TMS):  $\delta$  7.63–7.14 (m, 15H,  $15 \times Ph$ ), 6.30 (d,  $J = 7.2$  Hz, 1H, NH), 4.98–4.92 (m, 1H, NHCH), 3.35–3.29 (m, 2H,  $CH_2I$ ), 2.73–2.65 (m, 1H,  $CHCH_2I$ ), 2.54–2.44 (m, 2H,  $CHCH_2CHCH_2I$ ).

Both of the two isomers,  $^{13}\text{C}$  NMR ( $\text{CDCl}_3$ ; 100 MHz; TMS):  $\delta$  166.59, 166.53, 142.40, 141.78, 141.74, 140.94, 134.24, 131.59, 131.50, 129.16, 128.97, 128.77, 128.55, 128.47, 127.96, 127.64, 127.57, 127.52, 127.51, 127.44, 127.05, 126.96, 126.89, 126.19, 53.10, 51.84, 45.42, 45.11, 42.38, 40.77, 14.15, 13.31.  
HRMS (ESI):  $m/z$  ( $\text{M}+\text{H}^+$ ) calcd for  $\text{C}_{23}\text{H}_{23}\text{INO}$ , 456.0824. Found: 456.0823.

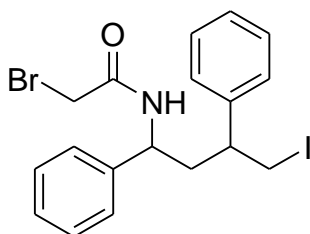

**2-bromo-N-(4-iodo-1,3-diphenylbutyl)acetamide (3e)**

Solid (64mg, 27%); mp. 152–154°C (one of the major isomers, recrystallized from the mixture of dichloromethane and ether);

FTIR (KBr,  $\text{cm}^{-1}$ ): 3266, 1649, 1540, 1283;

Major isomer,  $^1\text{H}$  NMR ( $\text{CDCl}_3$ ; 400 MHz; TMS):  $\delta$  7.36–7.24 (m, 6H, 6  $\times$  Ph), 7.20–7.11 (m, 4H, 4  $\times$  Ph), 6.79 (d,  $J$  = 8.3 Hz, 1H, NH), 4.80 (td,  $J$  = 9.2, 3.9 Hz, 1H, NHCH), 3.77 (d,  $J$  = 7.1 Hz, 2H,  $\text{CH}_2\text{Br}$ ), 3.34 (dd,  $J$  = 7.2, 2.5 Hz, 2H,  $\text{CH}_2\text{I}$ ), 3.91–2.80 (m, 1H, CHCH $_2\text{I}$ ), 2.48–2.41 (m, 1H, 1  $\times$  CHCH $_2\text{CHCH}_2\text{I}$ ), 2.17–2.10 (m, 1H, 1  $\times$  CHCH $_2\text{CHCH}_2\text{I}$ ).  $^{13}\text{C}$  NMR ( $\text{CDCl}_3$ ; 100 MHz; TMS):  $\delta$  164.73, 141.89, 141.21, major + minor isomer (129.08, 129.02, 128.95, 128.83, 128.16, 127.70, 127.67, 127.61, 127.49, 127.36, 126.89, 126.06), 52.12, 45.45, 42.34, 29.19, 12.82.

Minor isomer,  $^1\text{H}$  NMR ( $\text{CDCl}_3$ ; 400 MHz; TMS):  $\delta$  7.39–7.27 (m, 6H, 6  $\times$  Ph), 7.24–7.11 (m, 4H, 4  $\times$  Ph), 6.67 (d,  $J$  = 7.5 Hz, 1H, NH), 4.74–4.68 (m, 1H, NHCH), 3.66 (s, 2H,  $\text{CH}_2\text{Br}$ ), 3.31–3.28 (m, 2H,  $\text{CH}_2\text{I}$ ), 2.65–2.59 (m, 1H, CHCH $_2\text{I}$ ), 2.33–2.25 (m, 2H, CHCH $_2\text{CHCH}_2\text{I}$ ).  $^{13}\text{C}$  NMR ( $\text{CDCl}_3$ ; 100 MHz; TMS):  $\delta$  164.41, 141.45, 140.09, major + minor isomer (129.08, 129.02, 128.95, 128.83, 128.16, 127.70, 127.67, 127.61, 127.49, 127.36, 126.89, 126.06), 53.20, 45.01, 40.69, 29.71, 13.70.

HRMS (ESI):  $m/z$  ( $\text{M}+\text{H}^+$ ) calcd for  $\text{C}_{18}\text{H}_{20}\text{BrINO}$ , 471.9773. Found: 471.9782.

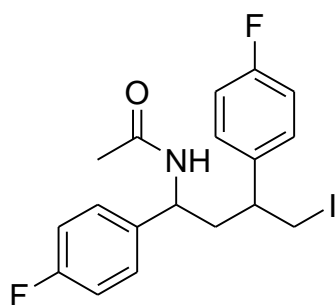

**N-(1,3-bis(4-fluorophenyl)-4-iodobutyl)acetamide (3f)**

Gummy liquid (152mg, 71%);

FTIR (KBr,  $\text{cm}^{-1}$ ): 3274, 1648, 1549, 1296;

One isomer,  $^1\text{H}$  NMR ( $\text{CDCl}_3$ ; 400 MHz; TMS):  $\delta$  7.16–6.91 (m, 8H, 8  $\times$  Ph), 6.24 (d,  $J$  = 8.5 Hz, 1H, NH), 4.75 (td,  $J$  = 9.4, 4.1 Hz, 1H, NHCH), 3.32 (d,  $J$  = 7.1 Hz, 2H,  $\text{CH}_2\text{I}$ ), 2.97–2.90 (m, 1H, CHCH $_2\text{I}$ ), 2.38–2.33 (m, 1H, 1  $\times$  CHCH $_2\text{CHCH}_2\text{I}$ ), 2.04–1.96 (m, 1H, 1  $\times$  CHCH $_2\text{CHCH}_2\text{I}$ ), 1.93 (s, 3H,  $\text{CH}_3$ ).



The other isomer,  $^1\text{H}$  NMR ( $\text{CDCl}_3$ ; 400 MHz; TMS):  $\delta$  7.16–6.91 (m, 8H,  $8 \times \text{Ph}$ ), 6.07 (d,  $J = 7.7$  Hz, 1H, NH), 4.70–4.64 (m, 1H, NHCH), 3.28–3.25 (m, 2H,  $\text{CH}_2\text{I}$ ), 2.58–2.51 (m, 1H,  $\text{CHCH}_2\text{I}$ ), 2.33–2.18 (m, 2H,  $\text{CHCH}_2\text{CHCH}_2\text{I}$ ), 1.82 (s, 3H,  $\text{CH}_3$ ).

Both of the two isomers,  $^{13}\text{C}$  NMR ( $\text{CDCl}_3$ ; 100 MHz; TMS): 169.50, 169.28, 162.21 (d,  $J = 246.5$  Hz), 162.00 (d,  $J = 246.1$  Hz), 161.93 (d,  $J = 246.0$  Hz), 138.00 (d,  $J = 3.2$  Hz), 137.73 (d,  $J = 3.2$  Hz), 137.14 (d,  $J = 3.2$  Hz), 136.56 (d,  $J = 3.2$  Hz), 129.02 (d,  $J = 8.0$  Hz), 128.91 (d,  $J = 8.0$  Hz), 128.71 (d,  $J = 8.1$  Hz), 127.84 (d,  $J = 8.0$  Hz), 115.80 (d,  $J = 21.3$  Hz), 115.74 (d,  $J = 21.5$  Hz), 115.52 (d,  $J = 22.7$  Hz), 51.57, 50.70, 44.85, 44.01, 42.74, 40.71, 23.29, 23.22, 13.82, 12.88.

HRMS (ESI):  $m/z$  ( $\text{M}+\text{H}^+$ ) calcd for  $\text{C}_{18}\text{H}_{19}\text{F}_2\text{INO}$ , 430.0479. Found: 430.0471.

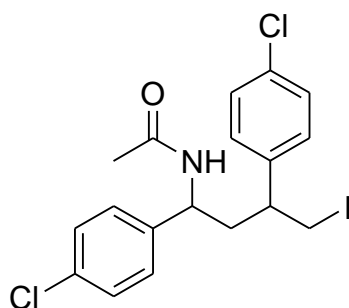

***N*-(1,3-bis(4-chlorophenyl)-4-iodobutyl)acetamide (3g)**

Gummy liquid (143mg, 62%);

FTIR (KBr,  $\text{cm}^{-1}$ ): 3276, 1649, 1545, 1291;

One isomer,  $^1\text{H}$  NMR ( $\text{CDCl}_3$ ; 400 MHz; TMS):  $\delta$  7.32–7.24 (m, 4H,  $4 \times \text{Ph}$ ), 7.12–7.03 (m, 4H,  $4 \times \text{Ph}$ ), 5.91 (d,  $J = 8.5$  Hz, 1H, NH), 4.76 (td,  $J = 9.5, 4.1$  Hz, 1H, NHCH), 3.32 (d,  $J = 7.2$  Hz, 2H,  $\text{CH}_2\text{I}$ ), 2.96–2.89 (m, 1H,  $\text{CHCH}_2\text{I}$ ), 2.38–2.35 (m, 1H,  $1 \times \text{CHCH}_2\text{CHCH}_2\text{I}$ ), 2.04–1.97 (m, 1H,  $1 \times \text{CHCH}_2\text{CHCH}_2\text{I}$ ), 1.96 (s, 3H,  $\text{CH}_3$ ).

The other isomer,  $^1\text{H}$  NMR ( $\text{CDCl}_3$ ; 400 MHz; TMS):  $\delta$  7.32–7.24 (m, 4H,  $4 \times \text{Ph}$ ), 7.12–7.03 (m, 4H,  $4 \times \text{Ph}$ ), 5.78 (d,  $J = 7.6$  Hz, 1H, NH), 4.69–4.63 (m, 1H, NHCH), 3.27–3.25 (m, 2H,  $\text{CH}_2\text{I}$ ), 2.58–2.51 (m, 1H,  $\text{CHCH}_2\text{I}$ ), 2.34–2.19 (m, 2H,  $\text{CHCH}_2\text{CHCH}_2\text{I}$ ), 1.84 (s, 3H,  $\text{CH}_3$ ).

Both of the two isomers  $^{13}\text{C}$  NMR ( $\text{CDCl}_3$ ; 100 MHz; TMS): 169.37, 169.16, 140.50, 140.42, 139.81, 139.10, 133.77, 133.35, 133.31, 133.27, 129.13, 129.12, 129.09, 128.89, 128.84, 128.72, 128.43, 127.61, 51.68, 50.72, 45.00, 44.21, 42.49, 40.46, 23.34, 23.25, 13.18, 12.27.

HRMS (ESI):  $m/z$  ( $\text{M}+\text{H}^+$ ) calcd for  $\text{C}_{18}\text{H}_{19}\text{Cl}_2\text{INO}$ , 461.9888. Found: 461.9887.

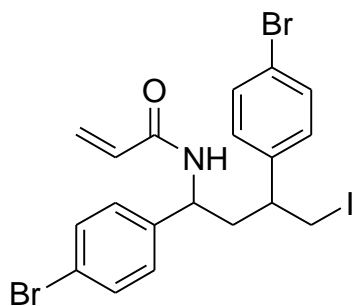

***N*-(1,3-bis(4-bromophenyl)-4-iodobutyl)acrylamide (3h)**

Solid (208mg, 74%); mp. 162–164°C (one of the major isomers, recrystallized from the mixture of dichloromethane and ether);

FTIR (KBr,  $\text{cm}^{-1}$ ): 3271, 1656, 1541, 1244;

Major isomer,  $^1\text{H}$  NMR ( $\text{CDCl}_3$ ; 400 MHz; TMS):  $\delta$  7.51–7.34 (m, 4H, 4  $\times$  Ph), 7.13–6.93 (m, 4H, 4  $\times$  Ph), 6.42–5.90 (m, 3H,  $\text{CH}_2=\text{CH}$ ), 5.63 (d,  $J$  = 10.2 Hz, 1H, NH), 4.81–4.75 (m, 1H, NHCH), 3.29 (d,  $J$  = 7.0 Hz, 2H,  $\text{CH}_2\text{I}$ ), 2.95–2.85 (m, 1H,  $\text{CHCH}_2\text{I}$ ), 2.38–2.34 (m, 1H, 1  $\times$   $\text{CHCH}_2\text{CHCH}_2\text{I}$ ), 2.04–1.96 (m, 1H, 1  $\times$   $\text{CHCH}_2\text{CHCH}_2\text{I}$ ).  $^{13}\text{C}$  NMR ( $\text{CDCl}_3$ ; 100 MHz; TMS):  $\delta$  165.00, major + minor isomer (140.89, 140.27, 139.44, 132.11, 132.06, 131.84, 131.79, 130.45, 130.38, 129.21, 129.11, 128.84, 127.97, 127.21, 127.05, 121.92, 121.48, 121.45, 121.37), 50.93, 45.02, 42.44, 12.07.

Minor isomer,  $^1\text{H}$  NMR ( $\text{CDCl}_3$ ; 400 MHz; TMS):  $\delta$  7.50–7.33 (m, 4H, 4  $\times$  Ph), 7.14–6.94 (m, 4H, 4  $\times$  Ph), 6.40–5.90 (m, 3H,  $\text{CH}_2=\text{CH}$ ), 5.57 (d,  $J$  = 10.2 Hz, 1H, NH), 4.73–4.68 (m, 1H, NHCH), 3.27–3.20 (m, 2H,  $\text{CH}_2\text{I}$ ), 2.55–2.49 (m, 1H,  $\text{CHCH}_2\text{I}$ ), 2.31–2.18 (m, 2H,  $\text{CHCH}_2\text{CHCH}_2\text{I}$ ).  $^{13}\text{C}$  NMR ( $\text{CDCl}_3$ ; 100 MHz; TMS):  $\delta$  164.72, major + minor isomer (140.89, 140.27, 139.44, 132.11, 132.06, 131.84, 131.79, 130.45, 130.38, 129.21, 129.11, 128.84, 127.97, 127.21, 127.05, 121.92, 121.48, 121.45, 121.37), 51.75, 44.13, 40.27, 13.07.

HRMS(ESI):  $m/z$  ( $\text{M}+\text{H}^+$ ) calcd for  $\text{C}_{19}\text{H}_{19}\text{Br}_2\text{INO}$ , 561.8878. Found: 561.8877.

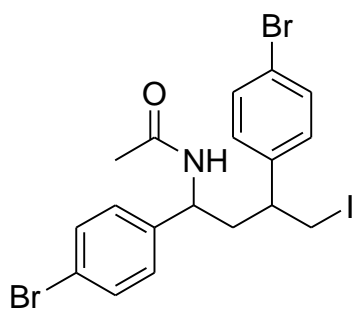

### ***N*-(1,3-bis(4-bromophenyl)-4-iodobutyl)acetamide (3i)**

Gummy liquid (116mg, 42%);

Major isomer,  $^1\text{H}$  NMR ( $\text{CDCl}_3$ ; 300 MHz; TMS):  $\delta$  7.49–7.40 (m, 4H, 4  $\times$  Ph), 7.08–6.98 (m, 4H, 4  $\times$  Ph), 5.73 (d,  $J$  = 8.5 Hz, 1H, NH), 4.76 (td,  $J$  = 9.6, 4.0 Hz, 1H, NHCH), 3.34 (d,  $J$  = 7.2 Hz, 2H,  $\text{CH}_2\text{I}$ ), 2.98–2.86 (m, 1H,  $\text{CHCH}_2\text{I}$ ), 2.41–2.36 (m, 1H, 1  $\times$   $\text{CHCH}_2\text{CHCH}_2\text{I}$ ), 2.06–2.00 (m, 1H, 1  $\times$   $\text{CHCH}_2\text{CHCH}_2\text{I}$ ), 1.98 (s, 3H,  $\text{CH}_3$ ).  $^{13}\text{C}$  NMR ( $\text{CDCl}_3$ ; 75 MHz; TMS):  $\delta$  169.39, major + minor isomers (140.94, 140.92, 140.28, 139.50, 132.15, 132.13, 132.09, 131.91, 129.23, 129.10, 128.81, 128.00, 121.97, 121.51, 121.48, 121.44), 50.79, 45.09, 42.37, 23.43, 12.16.

Minor isomer,  $^1\text{H}$  NMR ( $\text{CDCl}_3$ ; 300 MHz; TMS):  $\delta$  7.49–7.40 (m, 4H, 4  $\times$  Ph), 7.08–6.98 (m, 4H, 4  $\times$  Ph), 5.62 (d,  $J$  = 7.5 Hz, 1H, NH), 4.68–4.60 (m, 1H, NHCH), 3.28–3.25 (m, 2H,  $\text{CH}_2\text{I}$ ), 2.59–2.47 (m, 1H,  $\text{CHCH}_2\text{I}$ ), 2.36–2.23 (m, 2H,  $\text{CHCH}_2\text{CHCH}_2\text{I}$ ), 1.86 (s, 3H,  $\text{CH}_3$ ).  $^{13}\text{C}$  NMR ( $\text{CDCl}_3$ ; 75 MHz; TMS):  $\delta$  169.18, major + minor isomers (140.94, 140.92, 140.28, 139.50, 132.15, 132.13, 132.09, 131.91, 129.23, 129.10, 128.81, 128.00, 121.97, 121.51, 121.48, 121.44), 51.82, 44.33, 40.31, 23.33, 13.04.

HRMS (ESI):  $m/z$  ( $\text{M}+\text{H}^+$ ) calcd for  $\text{C}_{18}\text{H}_{19}\text{Br}_2\text{INO}$ , 549.8878. Found: 549.8875.

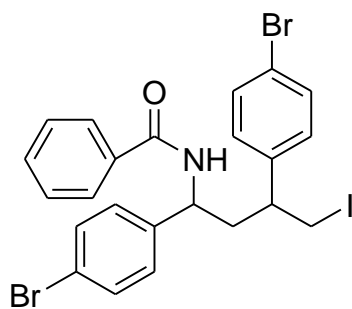

***N*-(1,3-bis(4-bromophenyl)-4-iodobutyl)benzamide (3j)**

Solid (166mg, 54%); mp. 205–207°C (one of the major isomers, recrystallized from the mixture of dichloromethane and ether);

FTIR (KBr,  $\text{cm}^{-1}$ ): 3295, 1637, 1533, 1290;

One isomer,  $^1\text{H}$  NMR ( $\text{CDCl}_3$ ; 400 MHz; TMS):  $\delta$  7.63 (d,  $J$  = 7.8 Hz, 2H,  $2 \times Ph$ ), 7.49–7.34 (m, 9H,  $9 \times Ph$ ), 7.13–7.00 (m, 2H,  $2 \times Ph$ ), 6.43 (d,  $J$  = 8.4 Hz, 1H, NH), 5.02 (td,  $J$  = 9.0, 3.6 Hz, 1H, NHCH), 3.33–3.26 (m, 2H,  $\text{CH}_2\text{I}$ ), 2.99–2.92 (m, 1H,  $\text{CHCH}_2\text{I}$ ), 2.46–2.42 (m, 1H,  $1 \times \text{CHCH}_2\text{CHCH}_2\text{I}$ ), 2.16–2.09 (m, 1H,  $1 \times \text{CHCH}_2\text{CHCH}_2\text{I}$ ).

The other isomer,  $^1\text{H}$  NMR ( $\text{CDCl}_3$ ; 400 MHz; TMS):  $\delta$  7.58 (d,  $J$  = 7.9 Hz, 2H,  $2 \times Ph$ ), 7.49–7.34 (m, 9H,  $9 \times Ph$ ), 7.13–7.00 (m, 2H,  $2 \times Ph$ ), 6.34 (d,  $J$  = 7.5 Hz, 1H, NH), 4.89–4.83 (m, 1H, NHCH), 3.33–3.26 (m, 2H,  $\text{CH}_2\text{I}$ ), 2.65–2.58 (m, 1H,  $\text{CHCH}_2\text{I}$ ), 2.39–2.34 (m, 2H,  $\text{CHCH}_2\text{CHCH}_2\text{I}$ ).

Both of the two isomers  $^{13}\text{C}$  NMR ( $\text{CDCl}_3$ ; 100 MHz; TMS):  $\delta$  166.76, 166.65, 141.08, 140.79, 140.48, 139.79, 133.91, 133.88, 132.28, 132.13, 132.10, 131.85, 131.81, 131.73, 129.21, 129.17, 128.79, 128.69, 128.55, 127.96, 126.96, 126.89, 121.89, 121.61, 121.47, 121.34, 52.35, 51.29, 44.97, 44.51, 42.18, 40.44, 13.16, 12.22.

HRMS(ESI):  $m/z$  ( $\text{M}+\text{H}^+$ ) calcd for  $\text{C}_{23}\text{H}_{21}\text{Br}_2\text{INO}$ , 611.9035. Found: 611.9031.

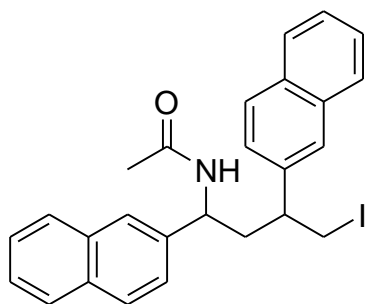

***N*-(4-iodo-3-(naphthalen-2-yl)-1-(naphthalen-3-yl)butyl)acetamide (3k)**

Gummy liquid (94mg, 38%);

FTIR (KBr,  $\text{cm}^{-1}$ ): 3274, 1648, 1545, 1271;

Major isomer,  $^1\text{H}$  NMR ( $\text{CDCl}_3$ ; 400 MHz; TMS):  $\delta$  7.87–7.74 (m, 6H,  $6 \times Ph$ ), 7.61 (s, 2H,  $2 \times Ph$ ), 7.51–7.44 (m, 4H,  $4 \times Ph$ ), 7.29 (d,  $J$  = 12.9 Hz, 2H,  $2 \times Ph$ ), 5.83 (d,  $J$  = 8.5 Hz, 1H, NH), 5.10 (td,  $J$  = 9.0, 4.4 Hz, 1H, NHCH), 3.50 (d,  $J$  = 7.0 Hz, 2H,  $\text{CH}_2\text{I}$ ), 3.20–3.13 (m, 1H,  $\text{CHCH}_2\text{I}$ ), 2.64–2.56 (m, 1H,  $1 \times \text{CHCH}_2\text{CHCH}_2\text{I}$ ), 2.37–2.30 (m, 1H,  $1 \times \text{CHCH}_2\text{CHCH}_2\text{I}$ ), 1.95 (s, 3H,  $\text{CH}_3$ ).  $^{13}\text{C}$  NMR ( $\text{CDCl}_3$ , 100 MHz, TMS):  $\delta$  169.40, major + minor isomer (139.61, 139.20, 138.95, 138.00, 133.54, 133.51, 133.34, 133.28, 133.01, 132.86, 132.81, 132.73, 128.90, 128.76, 128.74, 128.66, 127.95, 127.86, 127.84, 127.74, 127.71, 127.66, 127.63, 126.82, 126.70, 126.44, 126.36, 126.34, 126.32, 126.28, 126.20, 125.99, 125.97,

125.93, 125.14, 125.01, 124.89, 124.71, 124.48, 124.46), 51.58, 45.66, 42.29, 23.41, 13.69.

Minor isomer,  $^1\text{H}$  NMR ( $\text{CDCl}_3$ ; 400 MHz; TMS):  $\delta$  7.87–7.74 (m, 6H,  $6 \times Ph$ ), 7.56 (s, 2H,  $2 \times Ph$ ), 7.51–7.44 (m, 4H,  $4 \times Ph$ ), 7.34 (d,  $J = 8.5$  Hz, 2H,  $2 \times Ph$ ), 5.73 (d,  $J = 7.5$  Hz, 1H,  $NH$ ), 4.97–4.91 (m, 1H,  $NHCH$ ), 3.41 (d,  $J = 6.9$  Hz, 2H,  $CH_2I$ ), 2.85–2.80 (m, 1H,  $CHCH_2I$ ), 2.55–2.48 (m, 2H,  $CHCH_2CHCH_2I$ ), 1.80 (s, 3H,  $CH_3$ ).  $^{13}\text{C}$  NMR ( $\text{CDCl}_3$ , 100 MHz, TMS):  $\delta$  169.19, major + minor isomer (139.61, 139.20, 138.95, 138.00, 133.54, 133.51, 133.34, 133.28, 133.01, 132.86, 132.81, 132.73, 128.90, 128.76, 128.74, 128.66, 127.95, 127.86, 127.84, 127.74, 127.71, 127.66, 127.63, 126.82, 126.70, 126.44, 126.36, 126.34, 126.32, 126.28, 126.20, 125.99, 125.97, 125.93, 125.14, 125.01, 124.89, 124.71, 124.48, 124.46), 52.64, 45.20, 40.48, 23.28, 12.95.

HRMS(ESI):  $m/z$  ( $M+H^+$ ) calcd for  $\text{C}_{26}\text{H}_{25}\text{INO}$ , 494.0981. Found: 494.0977.

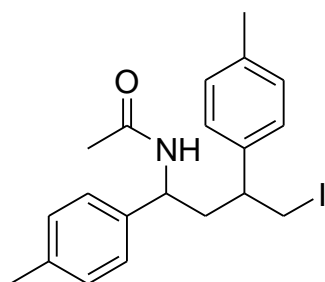

#### ***N*-(4-iodo-1, 3-dip-tolylbutyl)acetamide (3l)**

Gummy liquid (63mg, 30%);

One isomer,  $^1\text{H}$  NMR ( $\text{CDCl}_3$ ; 300 MHz; TMS):  $\delta$  7.15–7.01 (m, 8H,  $8 \times Ph$ ), 5.79 (d,  $J = 8.3$  Hz, 1H,  $NH$ ), 4.83 (td,  $J = 9.1, 4.4$  Hz, 1H,  $NHCH$ ), 3.35 (d,  $J = 7.2$  Hz, 2H,  $CH_2I$ ), 2.93–2.86 (m, 1H,  $CHCH_2I$ ), 2.40–2.37 (m, 1H,  $1 \times CHCH_2CHCH_2I$ ), 2.10–2.03 (m, 1H,  $1 \times CHCH_2CHCH_2I$ ), 2.34 (s, 3H,  $CH_3$ ), 2.33 (s, 3H,  $CH_3$ ), 1.91 (s, 3H,  $CH_3$ ).

The other isomer,  $^1\text{H}$  NMR ( $\text{CDCl}_3$ ; 300 MHz; TMS):  $\delta$  7.15–7.01 (m, 8H,  $8 \times Ph$ ), 5.70 (d,  $J = 7.5$  Hz, 1H,  $NH$ ), 4.70–4.64 (m, 1H,  $NHCH$ ), 3.30–3.24 (m, 2H,  $CH_2I$ ), 2.61–2.52 (m, 1H,  $CHCH_2I$ ), 2.32–2.23 (m, 2H,  $CHCH_2CHCH_2I$ ), 2.33 (s, 3H,  $CH_3$ ), 2.31 (s, 3H,  $CH_3$ ), 1.81 (s, 3H,  $CH_3$ ).

Both of the two isomers  $^{13}\text{C}$  NMR ( $\text{CDCl}_3$ ; 100 MHz; TMS):  $\delta$  169.23, 169.06, 139.24, 139.13, 138.61, 137.93, 137.54, 137.10, 137.02, 129.59, 129.54, 129.52, 129.36, 129.23, 127.41, 127.29, 126.97, 126.13, 52.20, 51.03, 45.00, 44.52, 42.48, 40.71, 36.69, 24.73, 23.39, 23.32, 21.15, 21.07, 14.50, 13.60.

HRMS (ESI):  $m/z$  ( $M+H^+$ ) calcd for  $\text{C}_{20}\text{H}_{25}\text{INO}$ , 422.0981. Found: 422.0984.

## Copies of NMR spectra of products

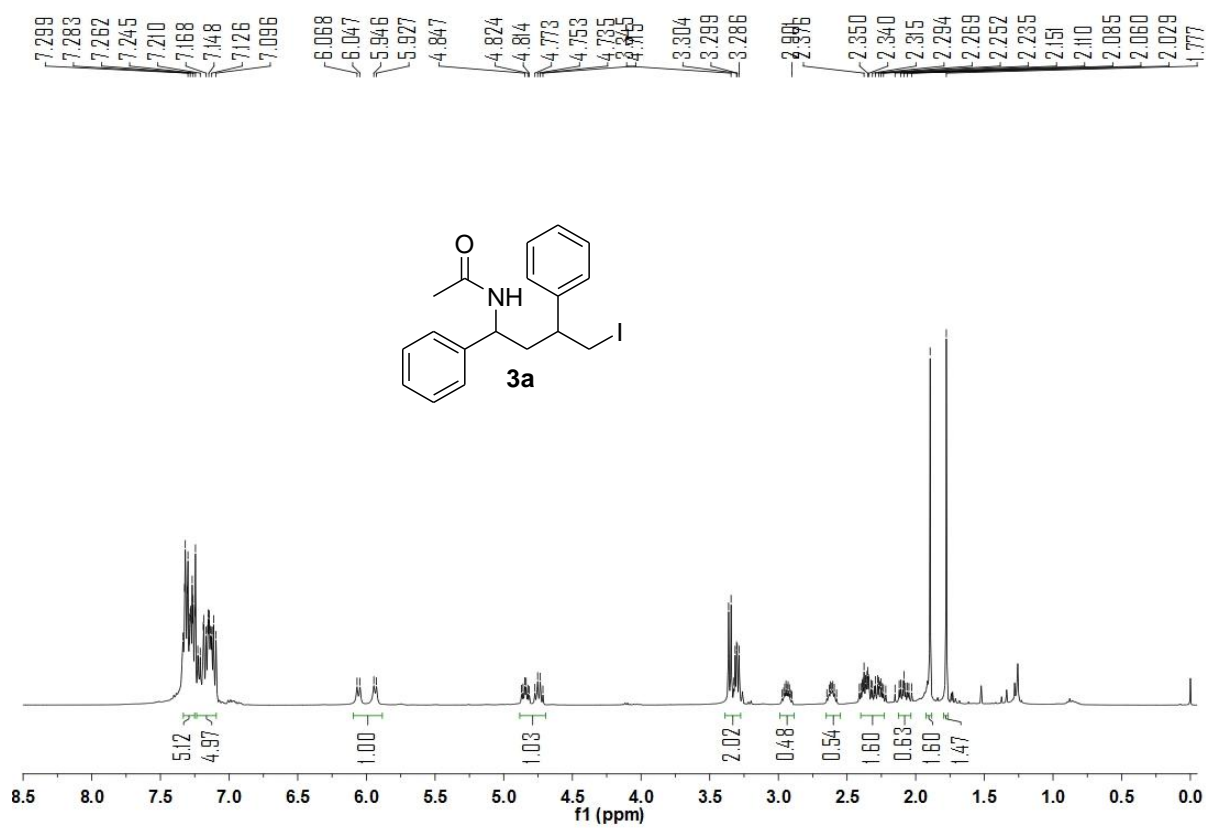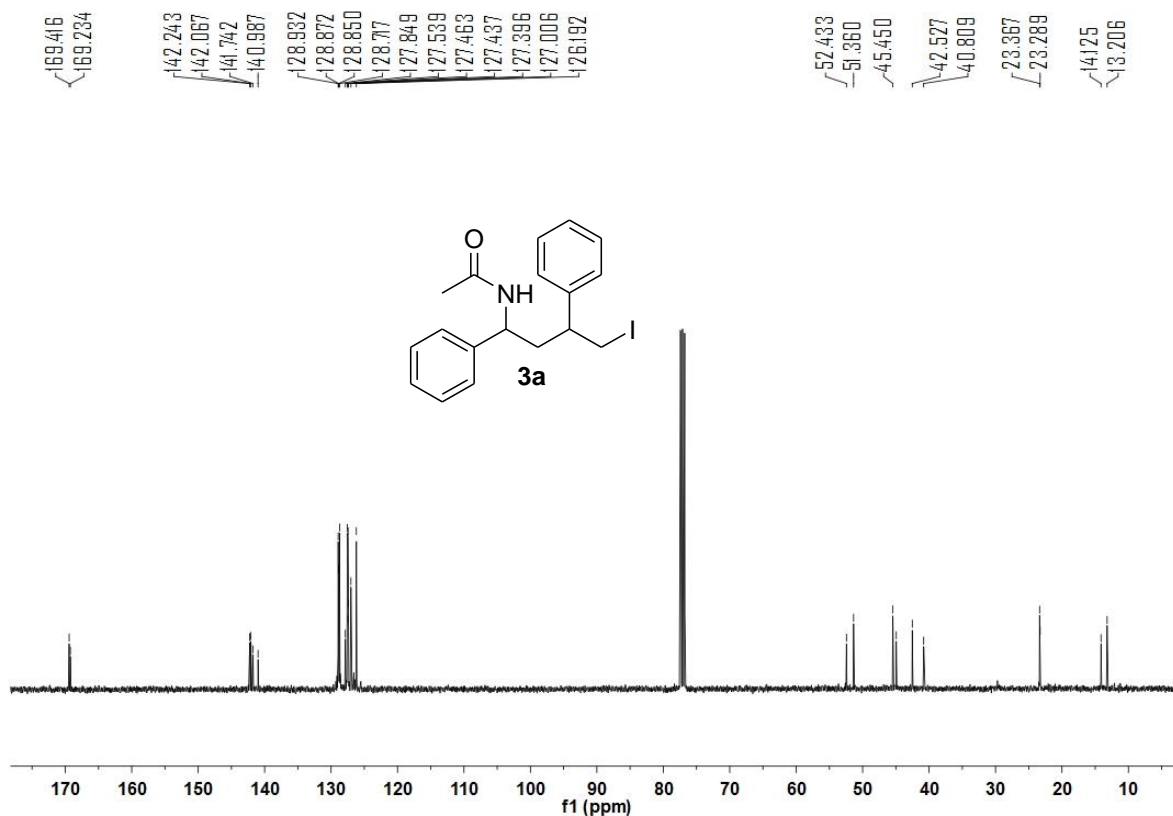

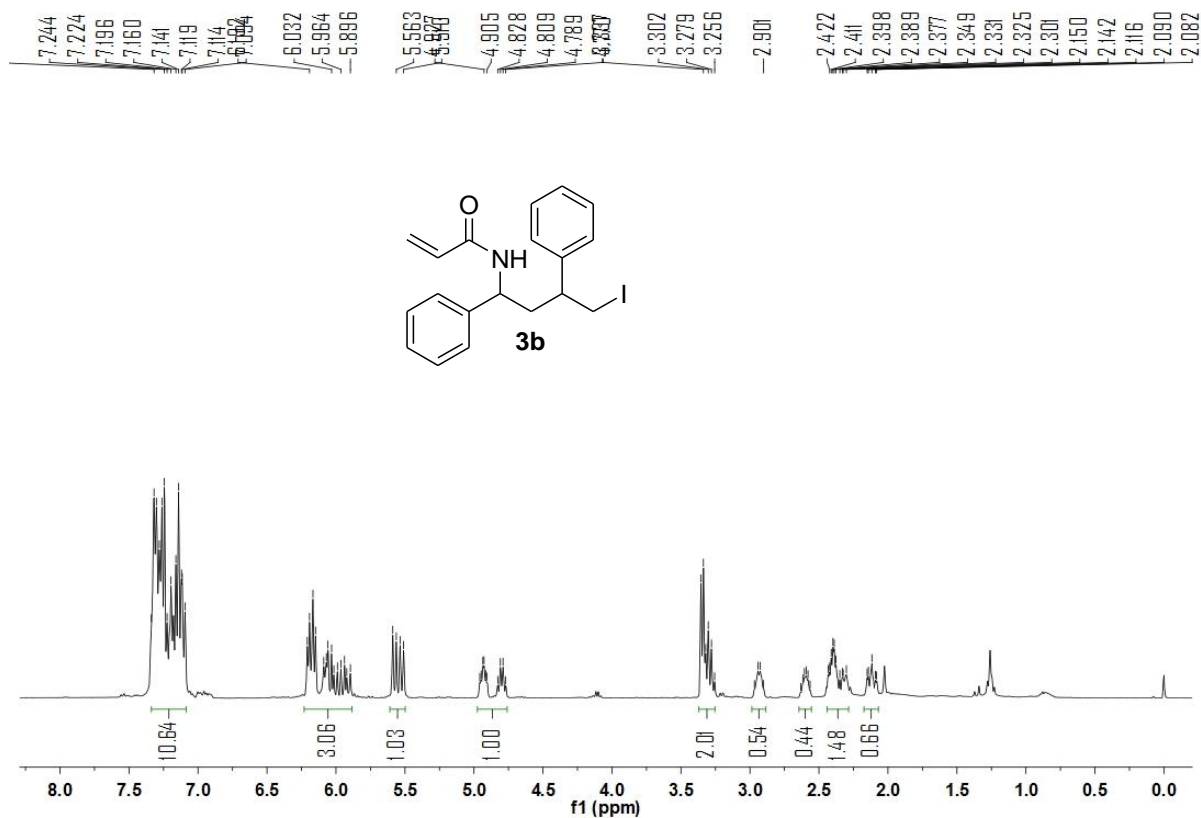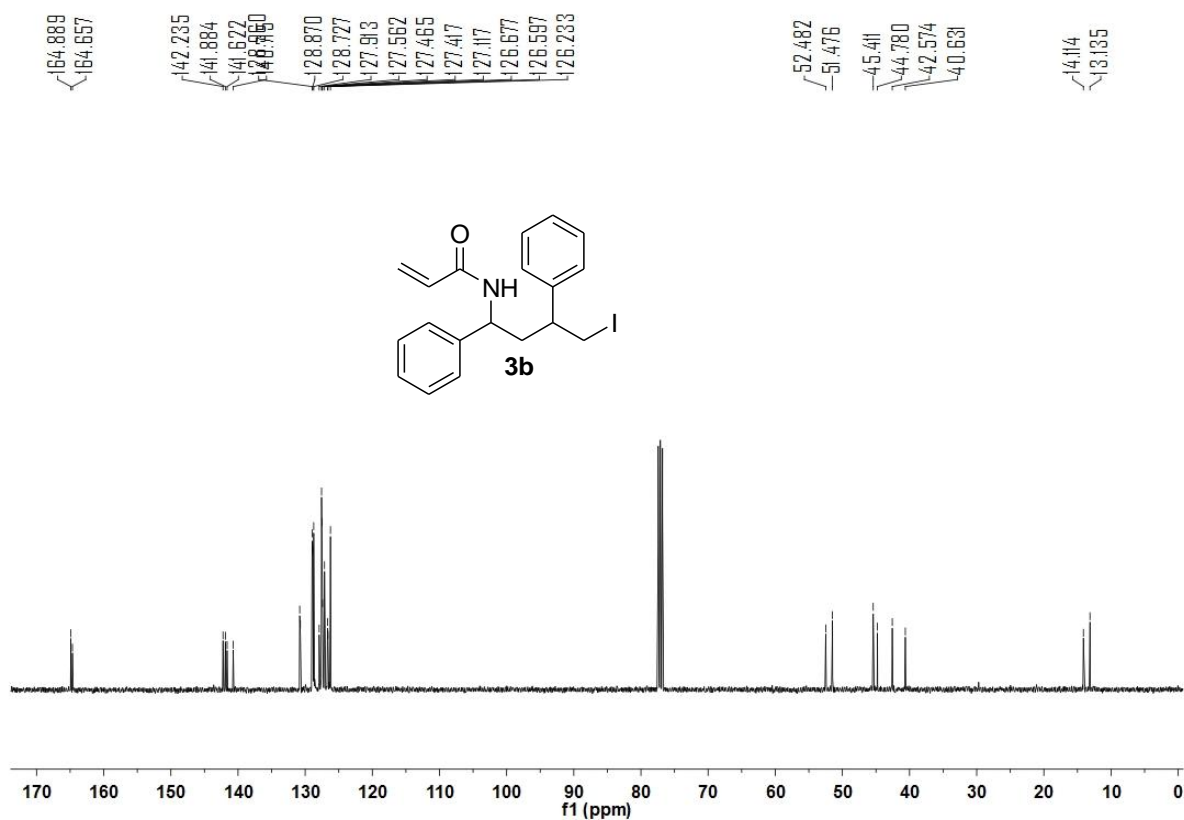

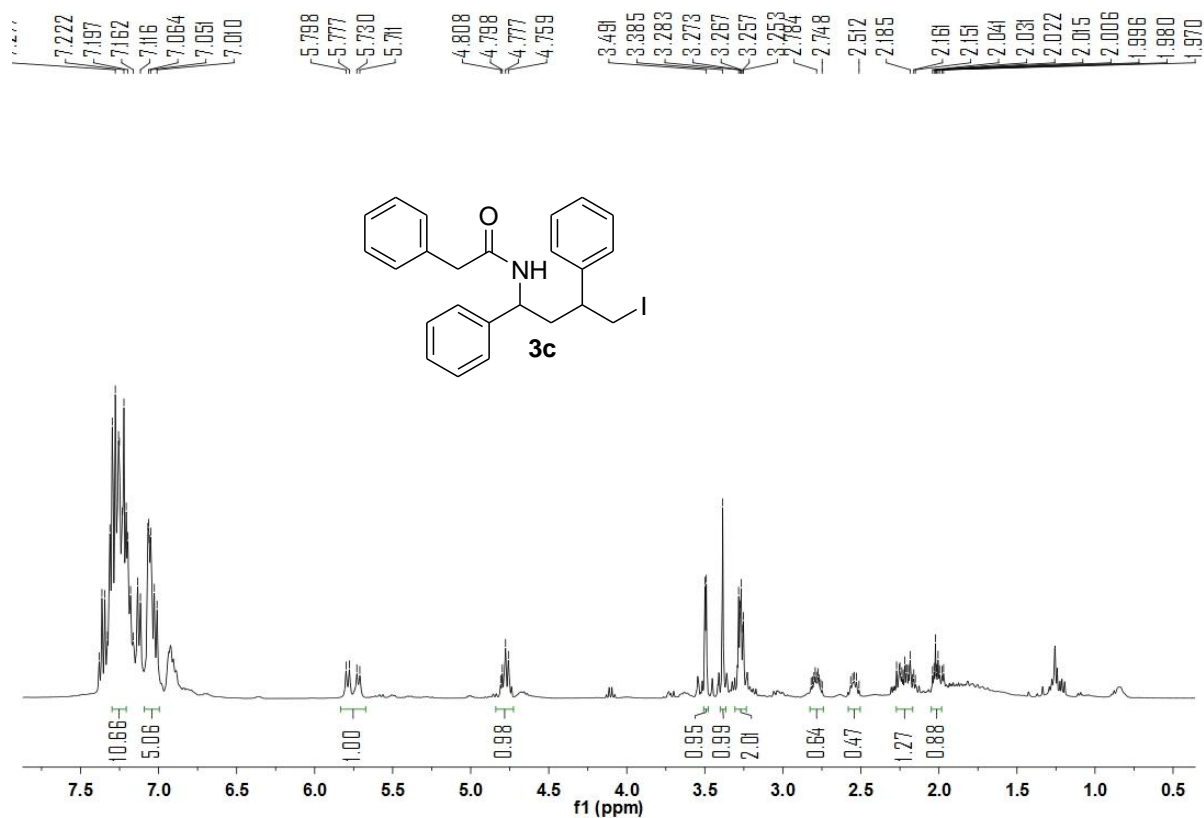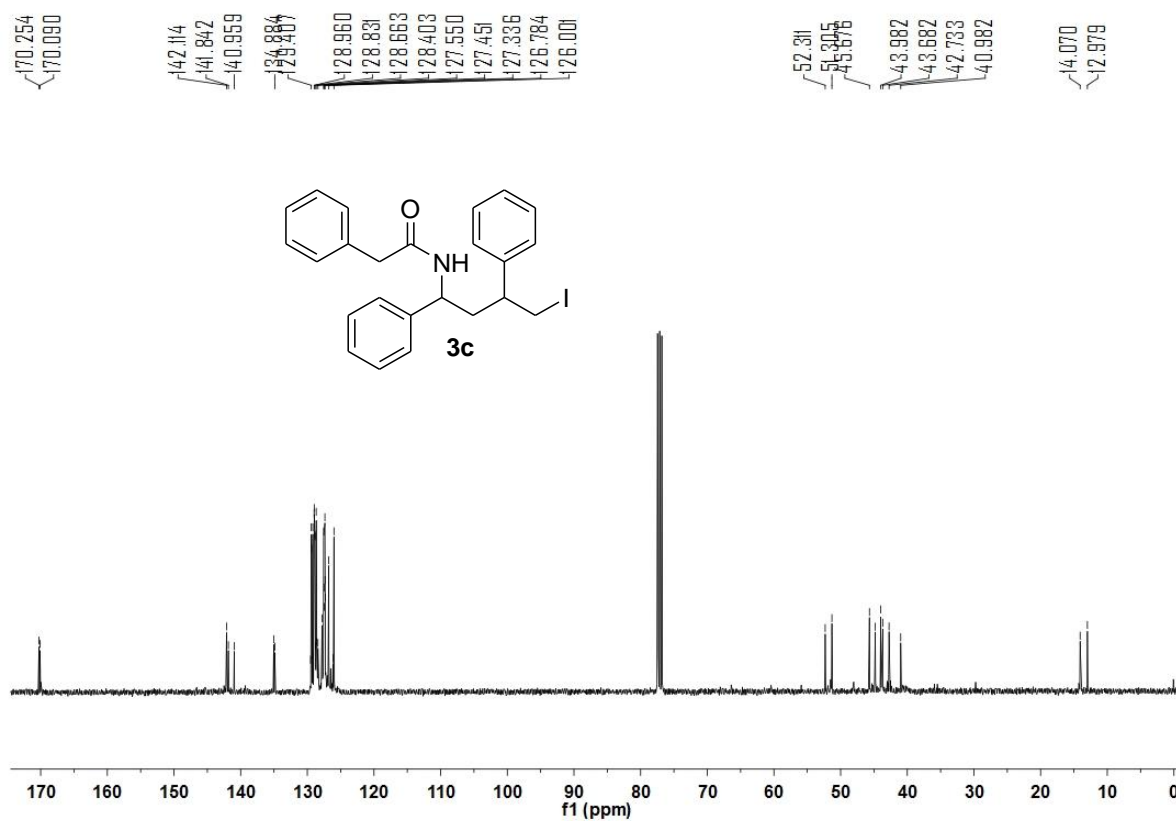

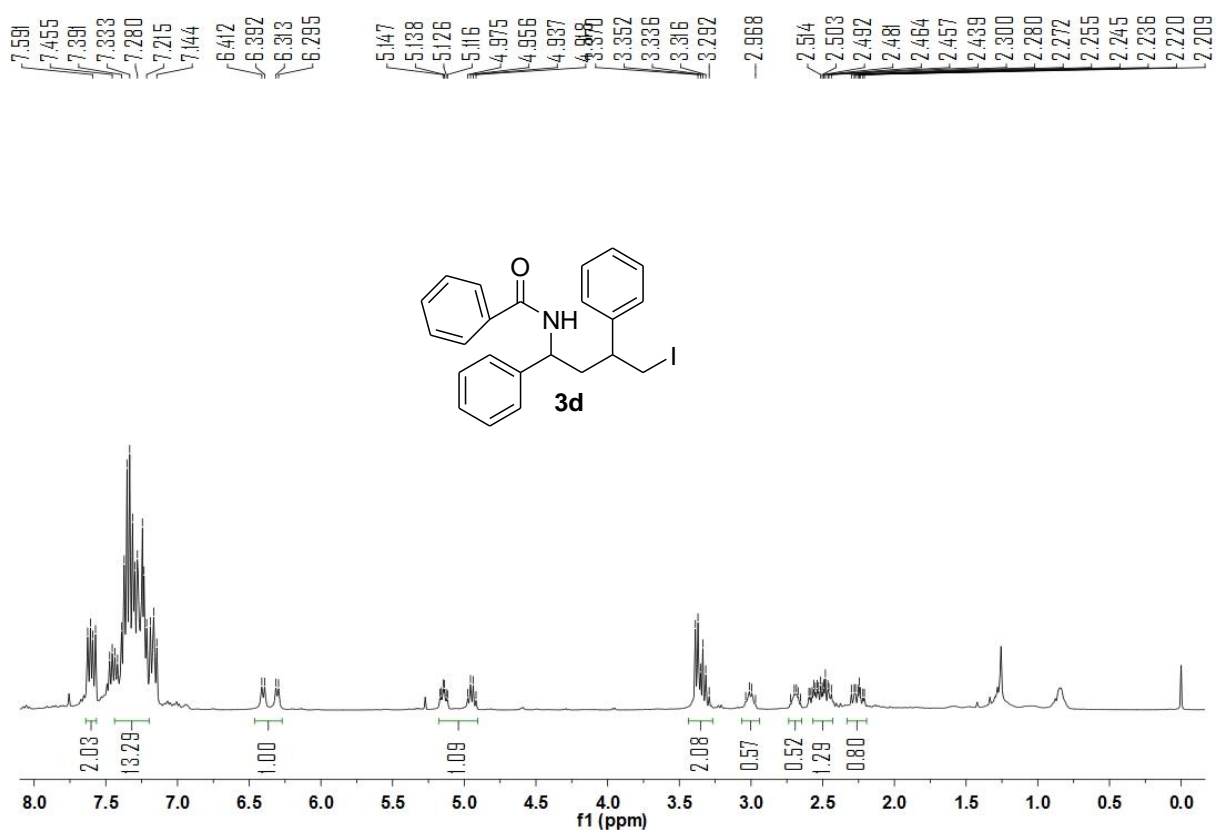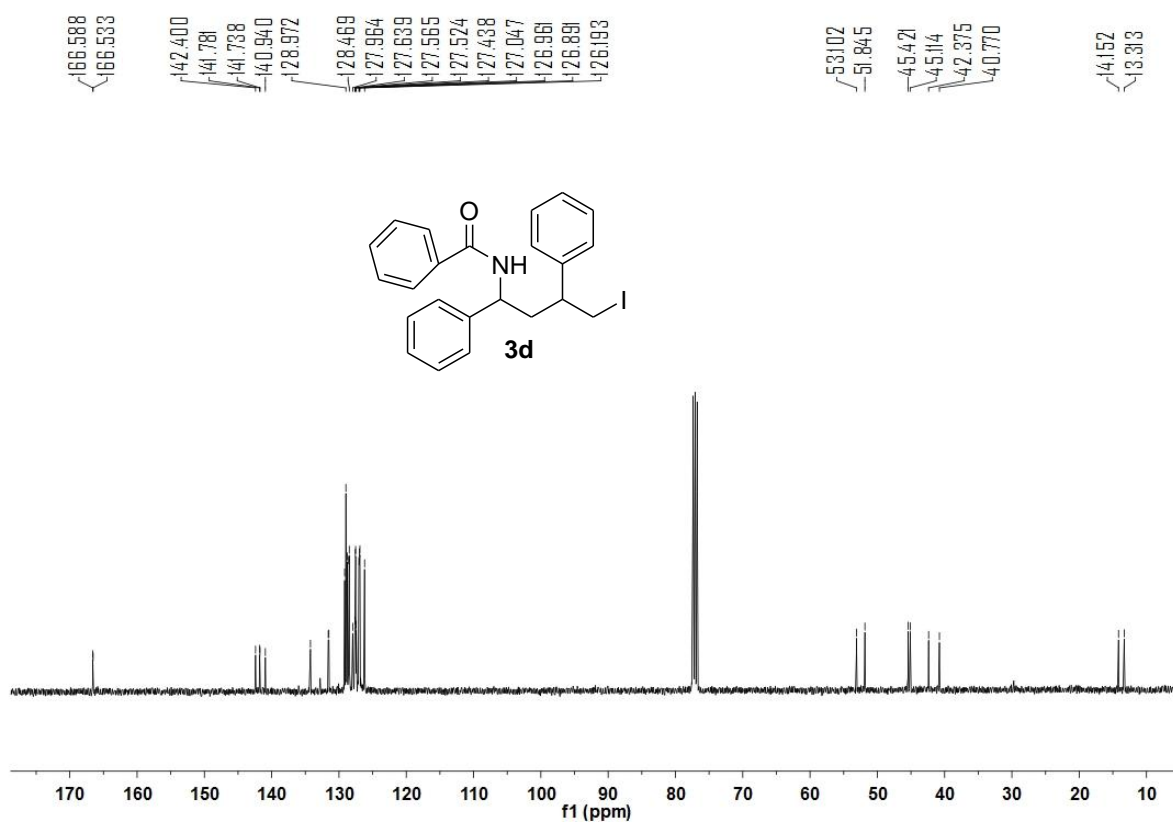



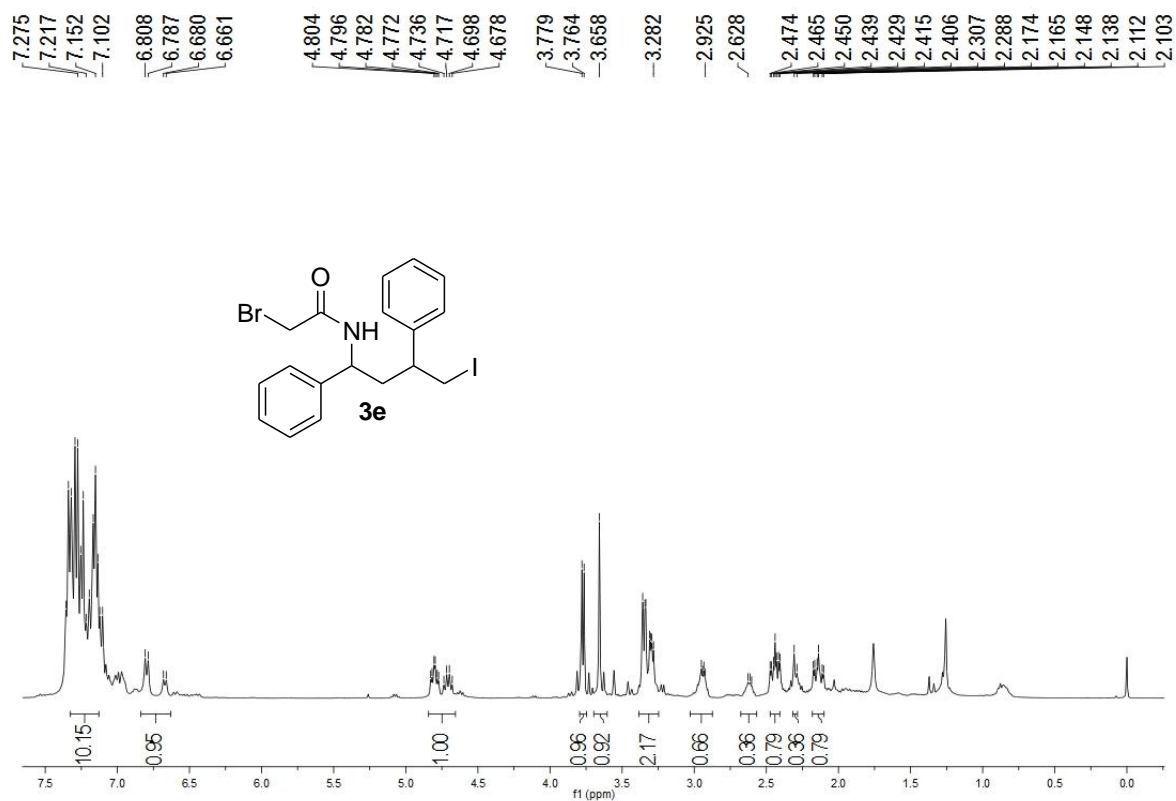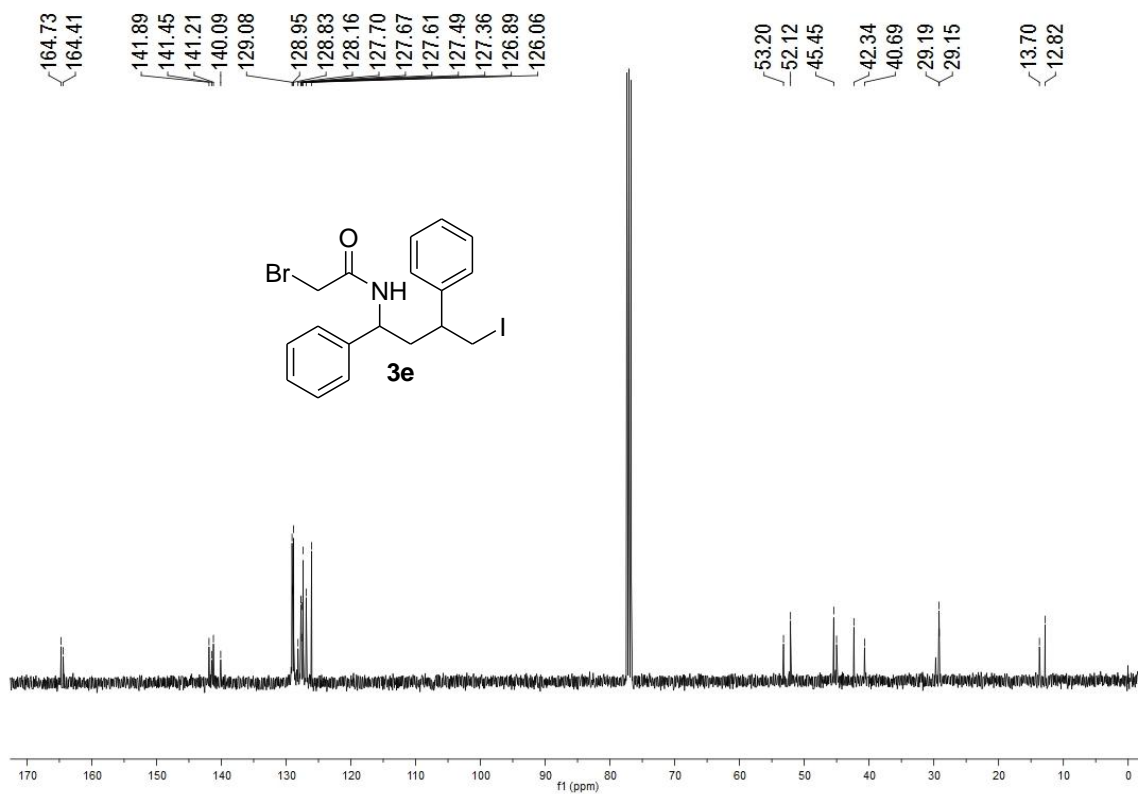

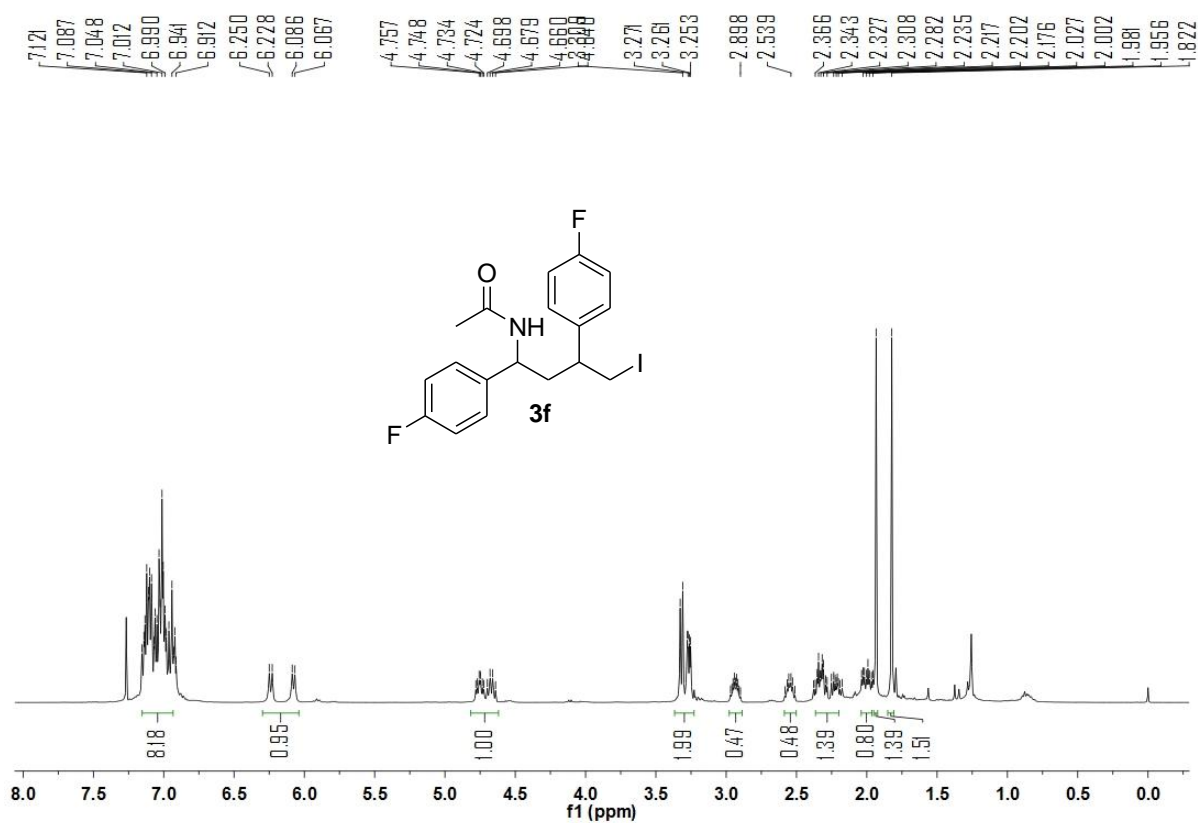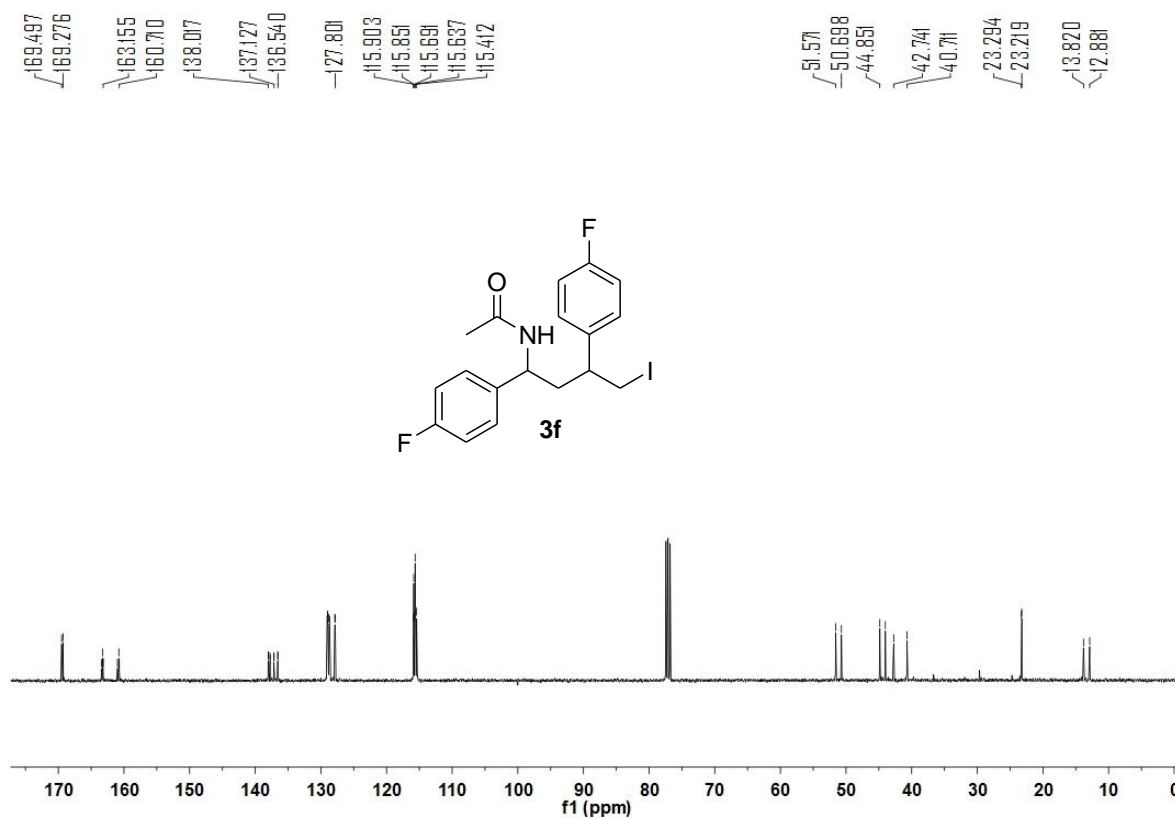

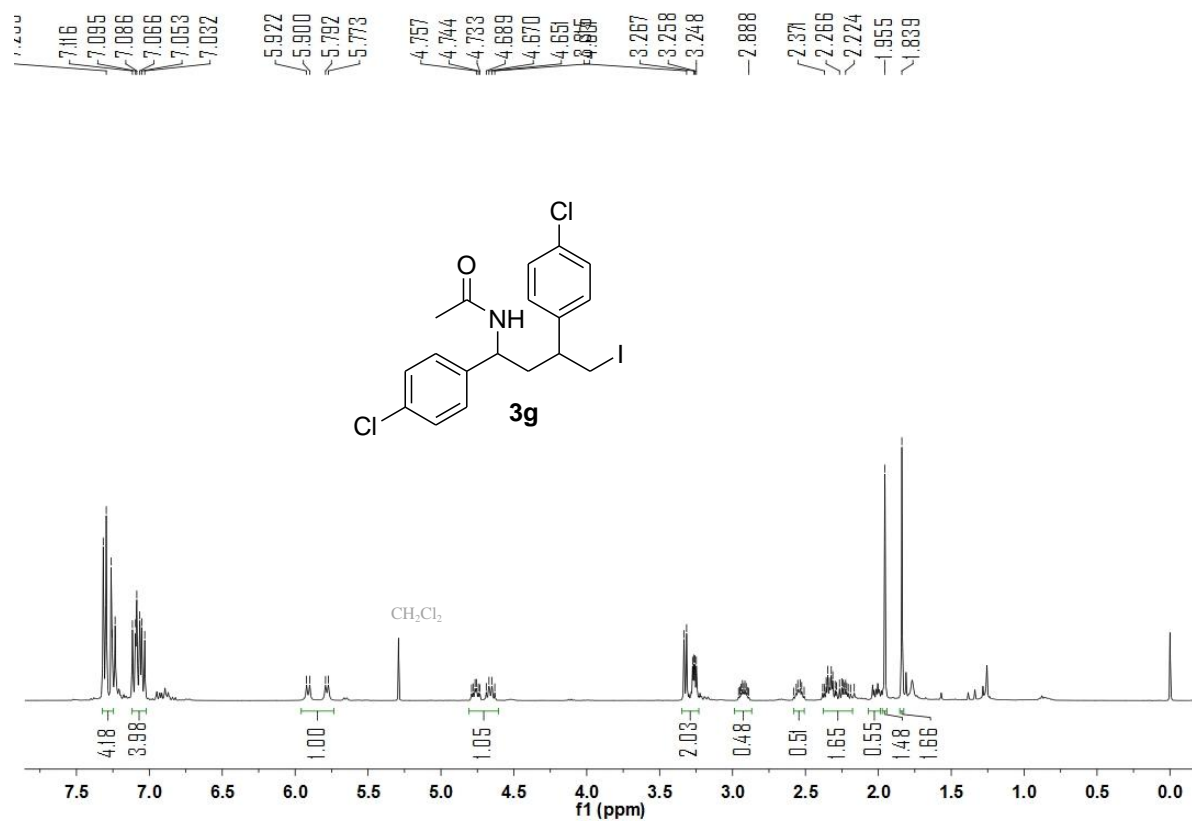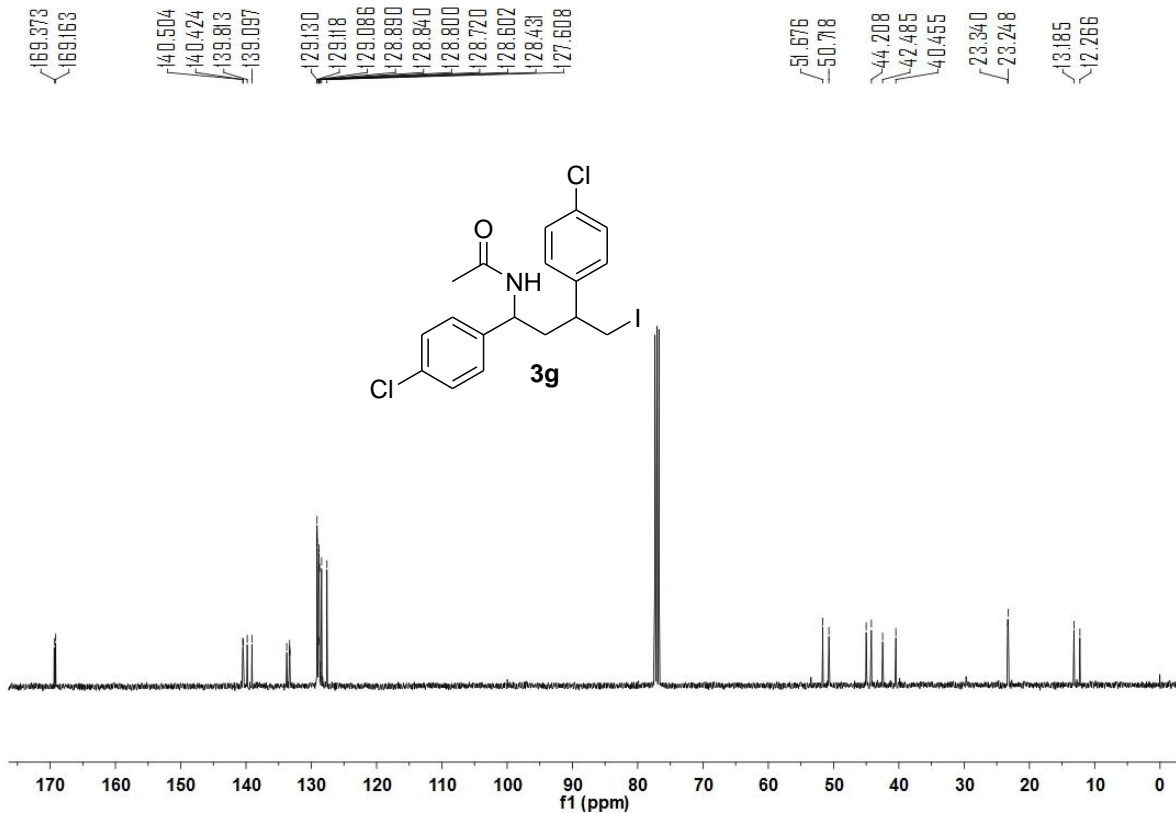

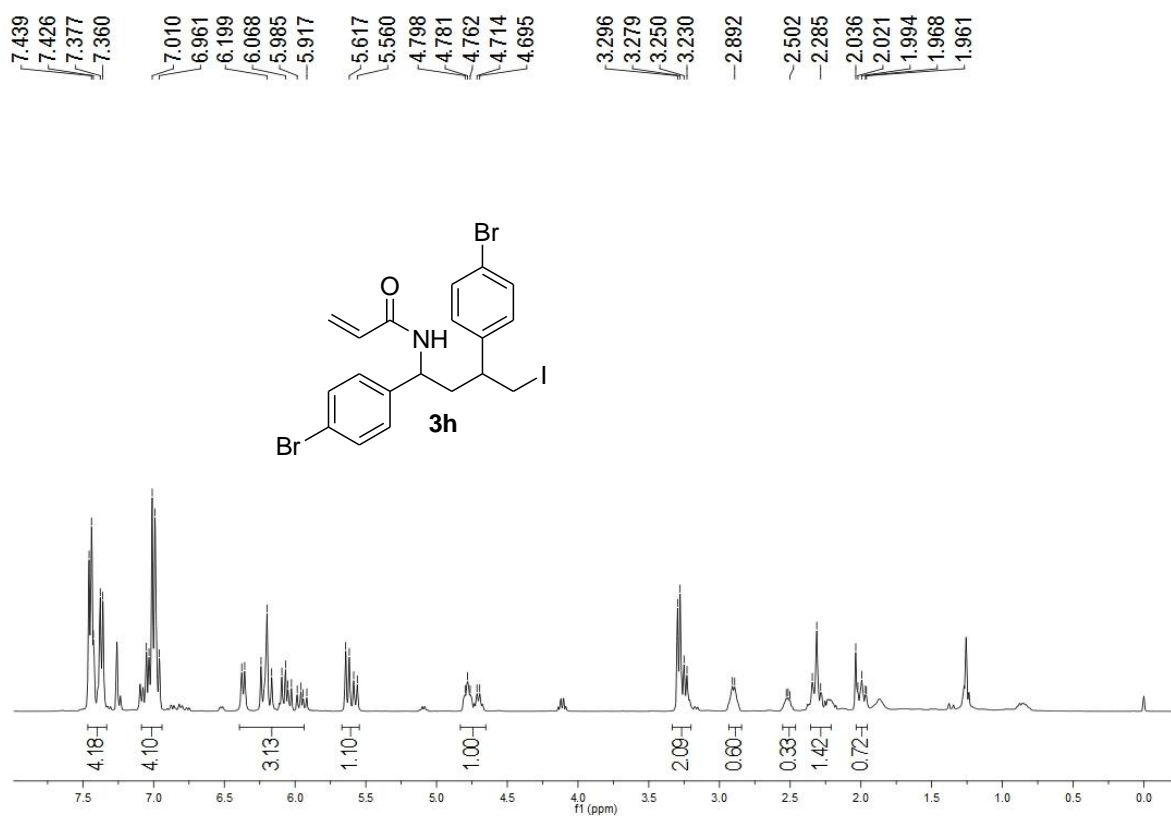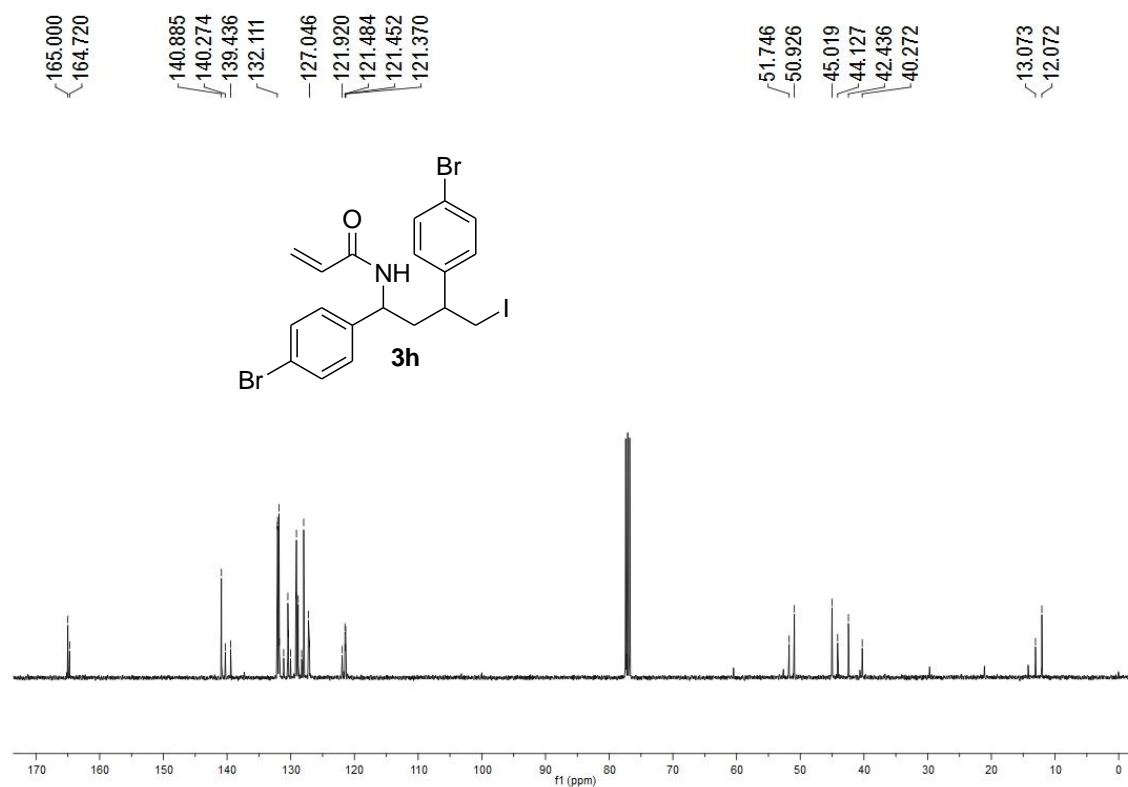

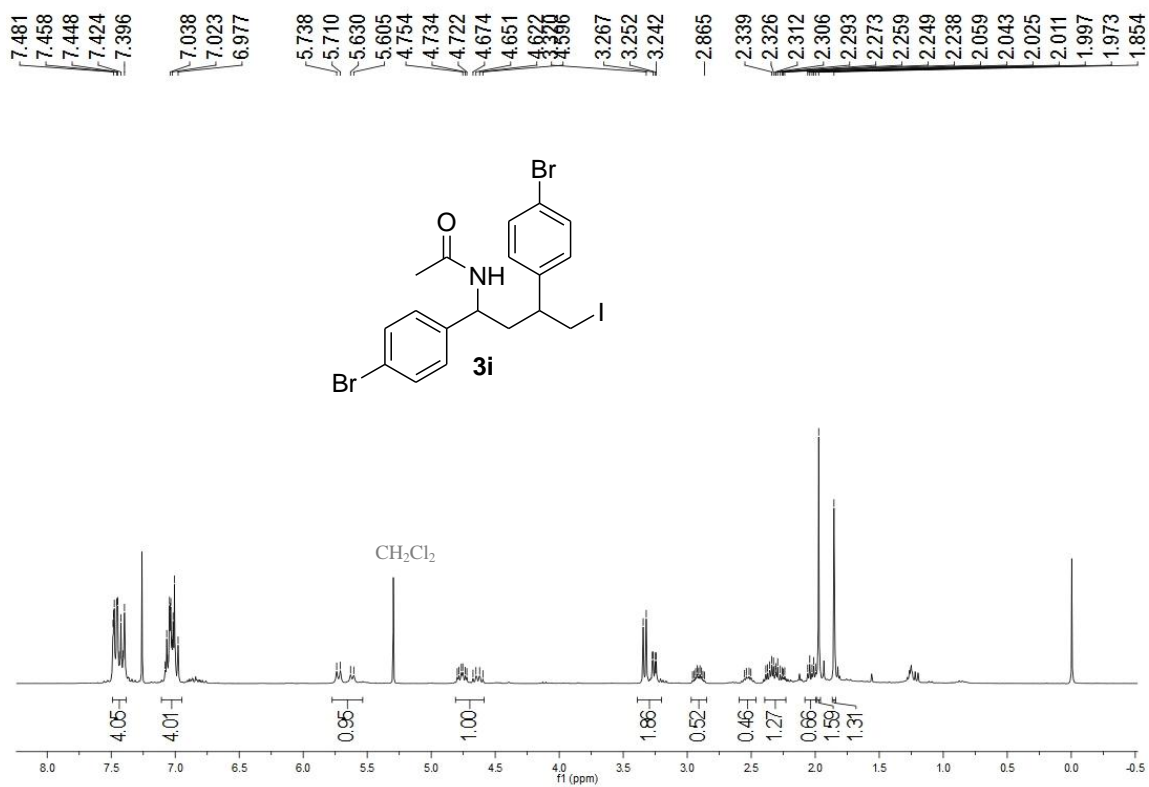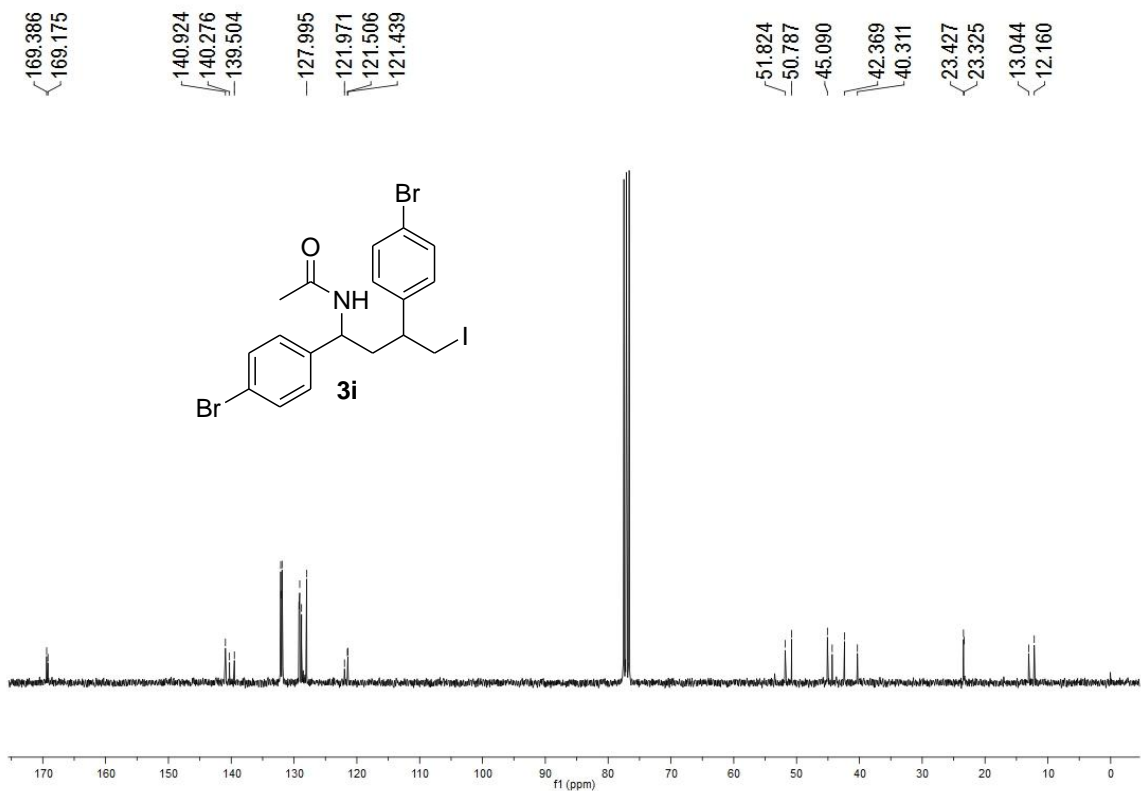

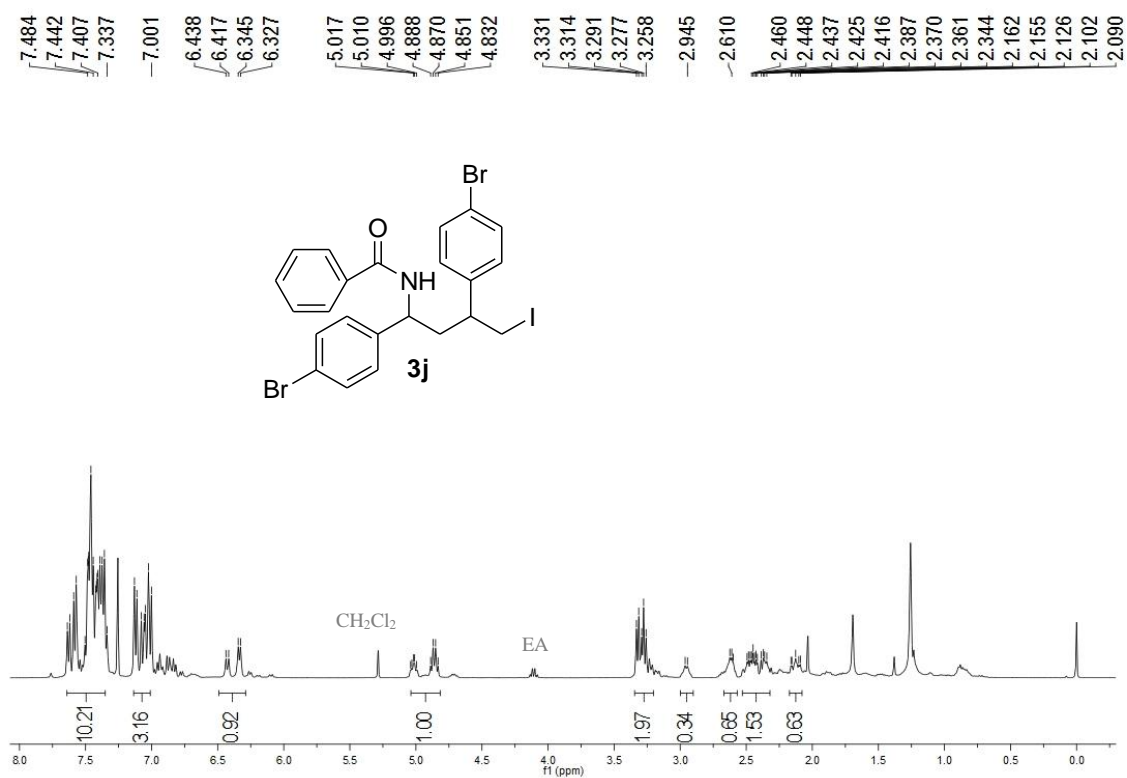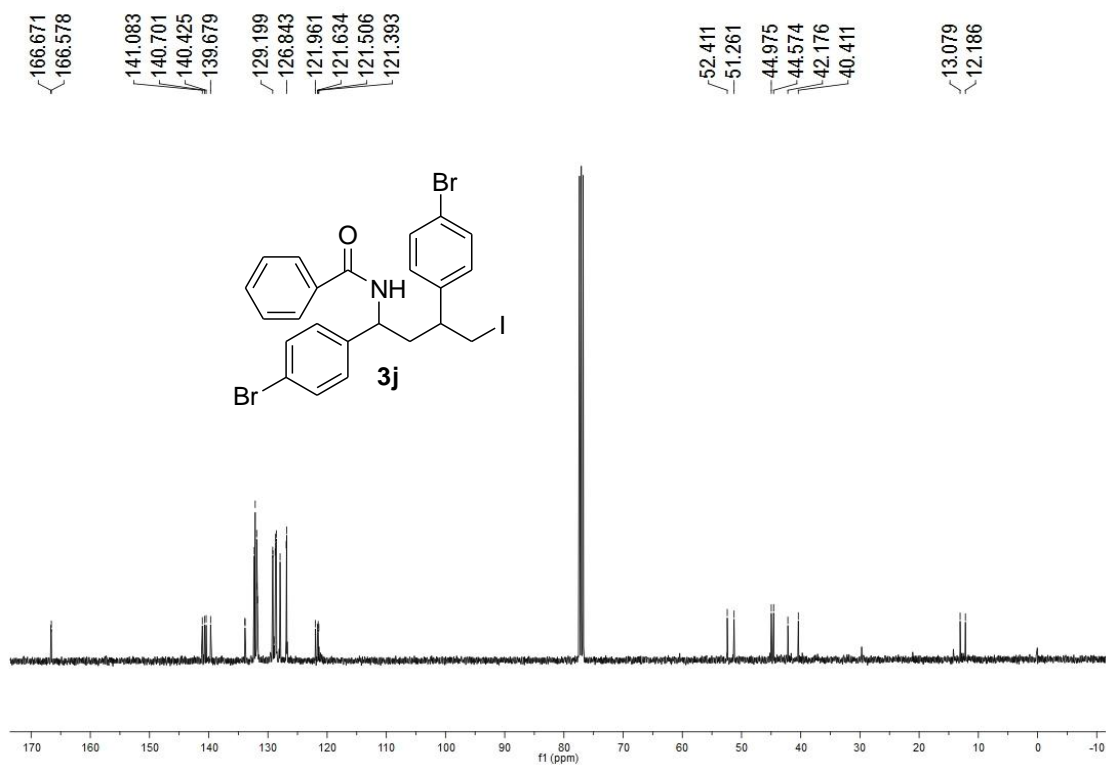

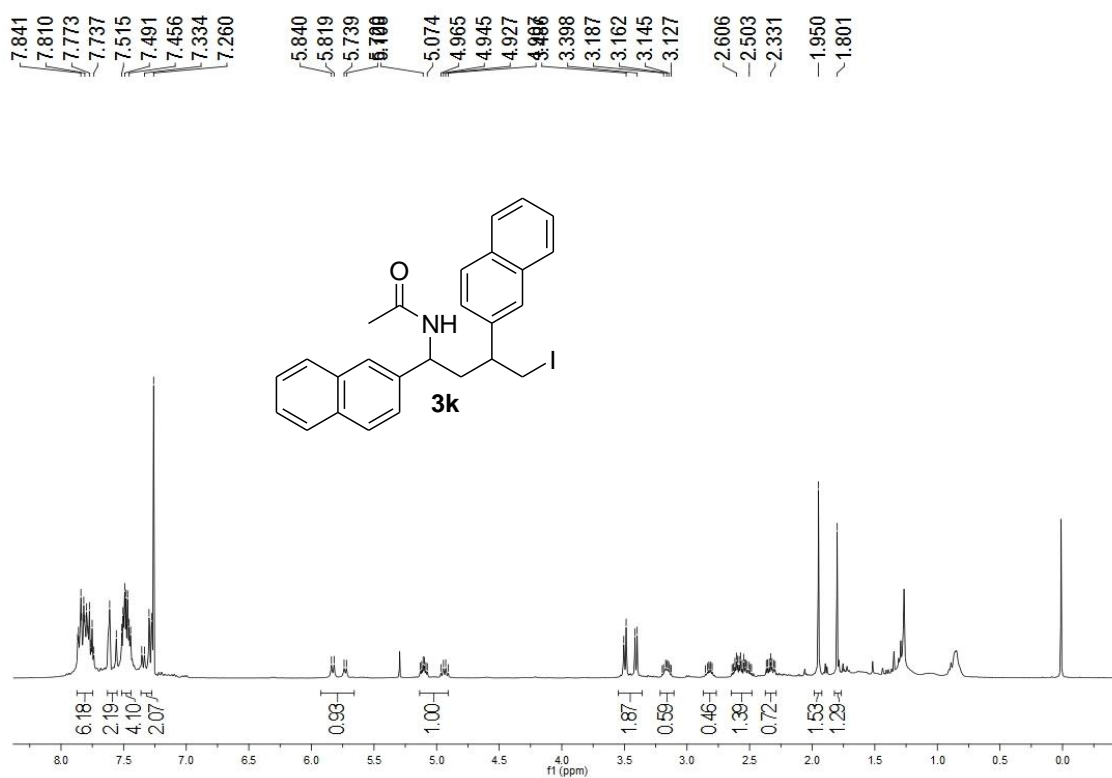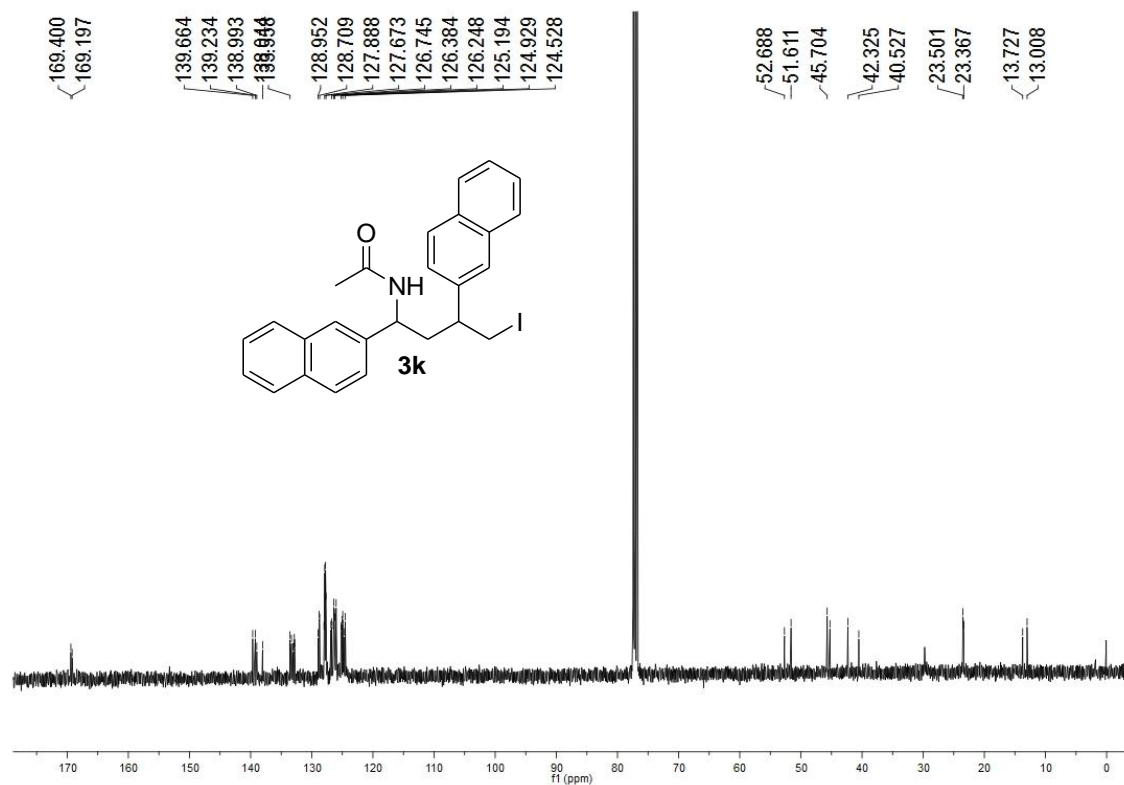

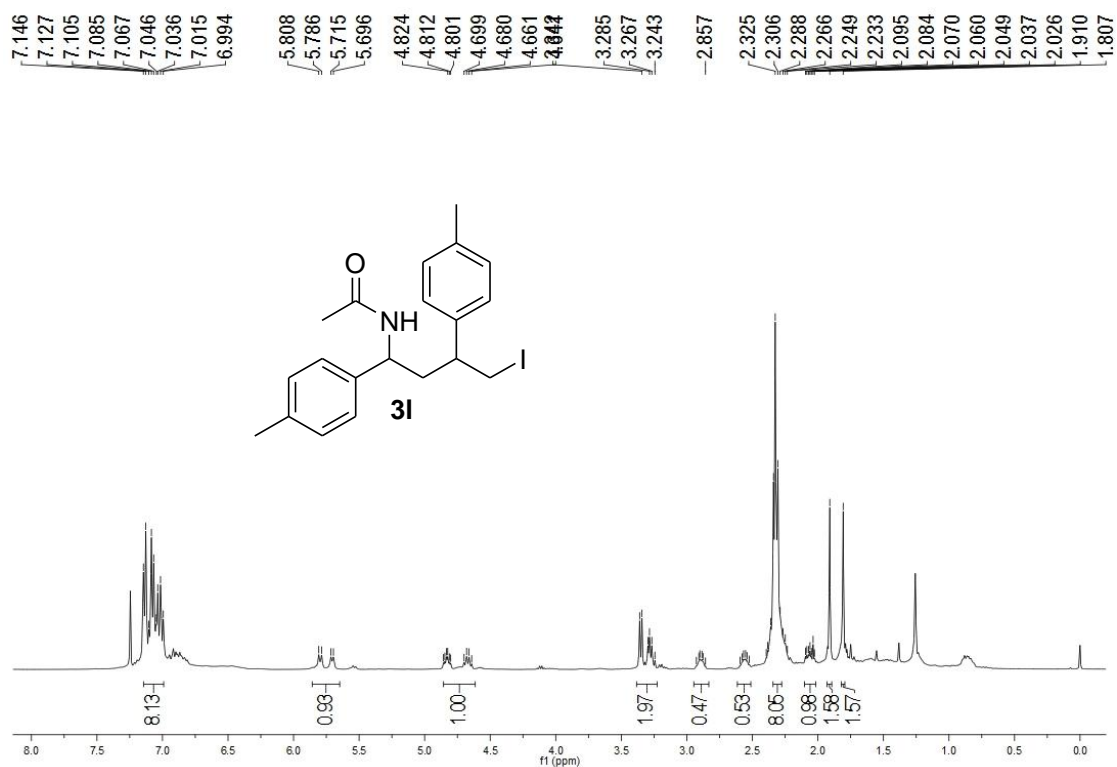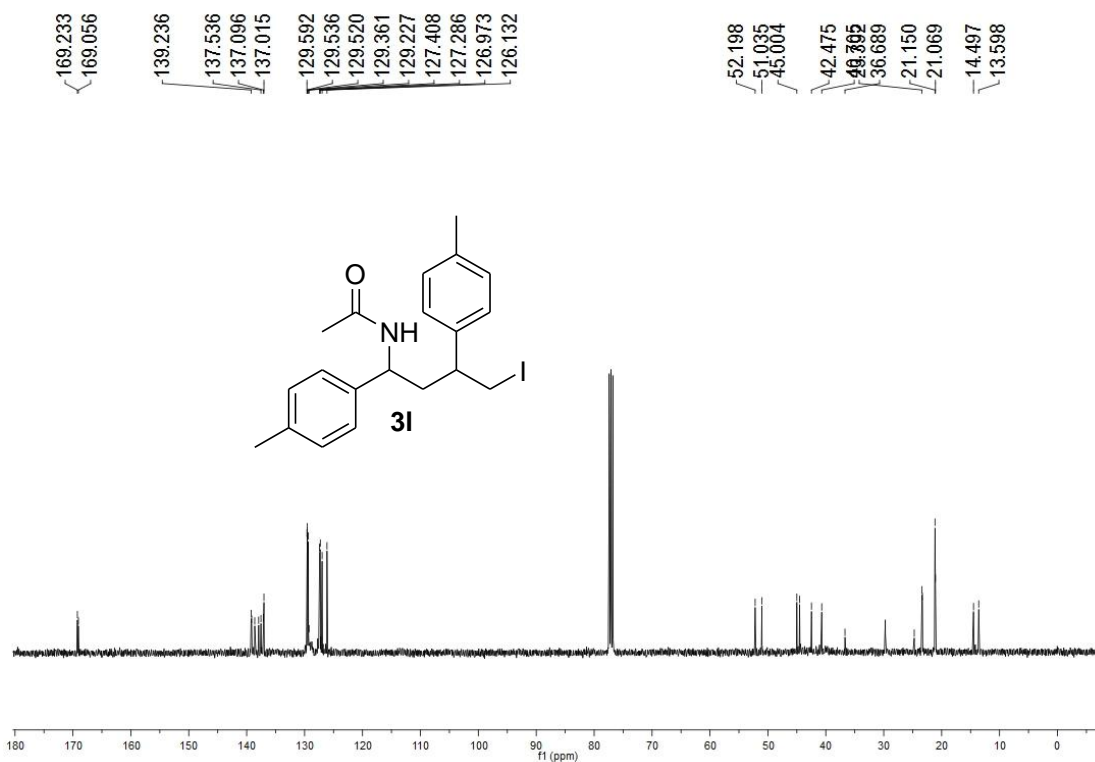

Supplement: c2ob25142f.pdf [file c2ob25142f.pdf]
